# Supplementary material for: Fermented cereal-origin gerobiotic cocktails promote healthy longevity in Caenorhabditis elegans
Source: Royal Society of Chemistry journal article supplement (doi:10.1039/d3fo02984k), 2023-01-01
Supplement: d3fo02984k1.pdf [file d3fo02984k1.pdf]

## SUPPORTING INFORMATION

*for*

### **Fermented cereal-origin gerobiotic cocktails promote healthy longevity in *Caenorhabditis elegans***

Thiruppathi Govindhan,<sup>a</sup> Mohankumar Amirthalingam,<sup>b, c\*</sup> Kalaiselvi Duraisamy,<sup>d</sup> Jeong Hoon Cho,<sup>e</sup> Shinkichi Tawata,<sup>b\*</sup> Sundararaj Palanisamy<sup>a\*</sup>

<sup>a</sup> Department of Zoology, Bharathiar University, Coimbatore, Tamil Nadu 641046, India

<sup>b</sup> PAK Research Center, University of the Ryukyus, Senbaru 1, Nishihara-cho, Okinawa 903-0213, Japan

<sup>c</sup> Department of Biology, Gus R. Douglass Institute, West Virginia State University, Institute, WV 25112, USA

<sup>d</sup> Division of Applied Bioscience and Biotechnology, Institute of Environmentally Friendly Agriculture, College of Agriculture and Life Sciences, Chonnam National University, Gwangju 500-757, Republic of Korea

<sup>e</sup> Department of Biology Education, College of Education, Chosun University, Gwangju 61452, Republic of Korea

#### **\*Correspondence to;**

**Mohankumar Amirthalingam, Ph.D.**

E-mail: [amkkmohan@gmail.com](mailto:amkkmohan@gmail.com)

**Prof. Shinkichi Tawata**

E-mail: [b986097@agr.u-ryukyu.ac.jp](mailto:b986097@agr.u-ryukyu.ac.jp)

**Prof. Sundararaj Palanisamy**

E-mail: [sunpalan@gmail.com](mailto:sunpalan@gmail.com)

## TABLE OF CONTENTS

| S. No. | Particulars                 | Page |
|--------|-----------------------------|------|
| 1.     | Resource Table .....        | 3    |
| 2.     | Materials and Methods ..... | 6    |
| 3.     | Table S1 .....              | 13   |
| 4.     | Table S2 .....              | 14   |
| 5.     | Table S3 .....              | 15   |
| 6.     | Table S4 .....              | 16   |
| 7.     | Table S5 .....              | 17   |
| 8.     | Table S6 .....              | 18   |
| 9.     | Table S7 .....              | 19   |
| 10.    | Table S8 .....              | 20   |
| 11.    | Table S9 .....              | 21   |
| 12.    | Table S10 .....             | 24   |
| 13.    | Figure S1 .....             | 26   |
| 14.    | Figure S2 .....             | 27   |
| 15.    | Figure S3 .....             | 29   |
| 16.    | Figure S4 .....             | 30   |
| 17.    | Figure S5 .....             | 31   |

## 1. Resource Table

| REAGENT/RESOURCE                                         | SOURCES           | IDENTIFIER                                                              |
|----------------------------------------------------------|-------------------|-------------------------------------------------------------------------|
| <b>Chemicals, reagents, fluorescent probes, and kits</b> |                   |                                                                         |
| 5-Fluoro-2'-deoxyuridine                                 | Sigma-Aldrich     | F0503                                                                   |
| Bile salt                                                | Sigma-Aldrich     | B8756                                                                   |
| L-cysteine                                               | Sigma-Aldrich     | 1.02838                                                                 |
| 2',7'-Dichlorodihydrofluorescein diacetate               | Invitrogen        | D399                                                                    |
| ABTS                                                     | HiMedia           | MB255                                                                   |
| Acid Blue 9 (Blue food dye)                              | HiMedia           | GRM366                                                                  |
| Ascorbate                                                | HiMedia           | CMS040                                                                  |
| Brain-heart infusion (BHI) agar                          | HiMedia           | M211                                                                    |
| DPPH                                                     | HiMedia           | MB263                                                                   |
| Ferrous sulphate                                         | HiMedia           | PCT0111                                                                 |
| Gentamicin                                               | HiMedia           | TC026                                                                   |
| Hydrochloric acid                                        | HiMedia           | TC536M                                                                  |
| Hydrogen peroxide                                        | HiMedia           | PCT1511                                                                 |
| Kanamycin                                                | HiMedia           | PCT1105                                                                 |
| LB agar                                                  | HiMedia           | M1151                                                                   |
| Linoleic acid                                            | HiMedia           | GRM10250                                                                |
| MRS Agar                                                 | HiMedia           | M641                                                                    |
| MRS broth                                                | HiMedia           | GM369                                                                   |
| Nicotinamide adenine dinucleotide                        | HiMedia           | RM392                                                                   |
| Nitro blue tetrazolium                                   | HiMedia           | PCT1209                                                                 |
| Phenazine methosulfate                                   | HiMedia           | TC484                                                                   |
| Potassium ferricyanide                                   | HiMedia           | GRM1034                                                                 |
| Potassium nitrate                                        | HiMedia           | GRM1401                                                                 |
| Potassium Nitrate                                        | HiMedia           | PCT0010                                                                 |
| Sodium acetate                                           | HiMedia           | GRM410                                                                  |
| Sodium azide                                             | HiMedia           | MB075                                                                   |
| Sodium hydroxide                                         | HiMedia           | TC460                                                                   |
| Streptomycin                                             | HiMedia           | PCT1120                                                                 |
| Trichloroacetic acid                                     | HiMedia           | GRM6274                                                                 |
| Trichloroacetic acid                                     | HiMedia           | MB293                                                                   |
| Triton X-100                                             | HiMedia           | MB031                                                                   |
| Xylene                                                   | HiMedia           | AS080                                                                   |
| $\beta$ -carotene                                        | HiMedia           | RM2039                                                                  |
| Culture media components                                 | HiMedia           | <a href="https://www.himedialabs.com/">https://www.himedialabs.com/</a> |
| RNeasy Mini Kit                                          | Qiagen            | 74104                                                                   |
| RevertAid First-strand cDNA synthesis kit                | Thermo Scientific | K1622                                                                   |
| TRIzol Reagent                                           | Invitrogen        | 15596018                                                                |
| SYBR Green Master Mix                                    | Sigma-Aldrich     | KK4601                                                                  |

| REAGENT/RESOURCE                                                                                 | SOURCES                                                                               | IDENTIFIER |
|--------------------------------------------------------------------------------------------------|---------------------------------------------------------------------------------------|------------|
| <b>Experimental model: <i>C. elegans</i></b>                                                     |                                                                                       |            |
| Wild-type                                                                                        | CGC, MN                                                                               | Bristol N2 |
| <i>daf-2(e1370)</i>                                                                              | CGC, MN                                                                               | CB1370     |
| <i>age-1(hx546)</i>                                                                              | CGC, MN                                                                               | TJ1052     |
| <i>daf-16(mu86)</i>                                                                              | CGC, MN                                                                               | CF1038     |
| <i>skn-1(zu67)</i>                                                                               | CGC, MN                                                                               | EU1        |
| <i>hsf-1(sy441)</i>                                                                              | CGC, MN                                                                               | PS3551     |
| <i>jnk-1(gk7)</i>                                                                                | CGC, MN                                                                               | VC8        |
| <i>mpk-1(ku1)</i>                                                                                | CGC, MN                                                                               | MH37       |
| <i>pmk-1(km25)</i>                                                                               | CGC, MN                                                                               | KU25       |
| <i>tir-1(ok1052)</i>                                                                             | CGC, MN                                                                               | RB1085     |
| <i>nsy-1(ag3)</i>                                                                                | CGC, MN                                                                               | AU3        |
| <i>sek-1(km4)</i>                                                                                | CGC, MN                                                                               | KU4        |
| <i>sir-2.1(ok434)</i>                                                                            | CGC, MN                                                                               | VC199      |
| <i>aak-2(ok524)</i>                                                                              | CGC, MN                                                                               | RB754      |
| <i>eat-2(ad1116)</i>                                                                             | CGC, MN                                                                               | DA1116     |
| <i>bar-1(ga80)</i>                                                                               | CGC, MN                                                                               | EW15       |
| <i>dbl-1(nk3)</i>                                                                                | CGC, MN                                                                               | NU3        |
| <i>muIs84(sod-3::GFP)</i>                                                                        | CGC, MN                                                                               | CF1553     |
| <i>dvIs70(hsp-16.2p::GFP)</i>                                                                    | CGC, MN                                                                               | CL2070     |
| <i>zIs356(daf-16::GFP)</i>                                                                       | CGC, MN                                                                               | TJ356      |
| <i>ldIs7(skn-1b/c::GFP)</i>                                                                      | CGC, MN                                                                               | LD1        |
| <i>dvIs19(gst-4::GFP)</i>                                                                        | CGC, MN                                                                               | CL2166     |
| <i>ldIs3(gcs-1::GFP)</i>                                                                         | CGC, MN                                                                               | LD1171     |
| <i>xnIs17(dlg-1::GFP)</i>                                                                        | CGC, MN                                                                               | FT63       |
| <b>Bacterial strains</b>                                                                         |                                                                                       |            |
| <i>Escherichia coli</i>                                                                          | CGC, MN                                                                               | OP50       |
| <i>Pseudomonas aeruginosa</i>                                                                    | MTCC, India                                                                           | 424        |
| <i>Staphylococcus aureus</i>                                                                     | MTCC, India                                                                           | 3160       |
| <i>Lactobacillus rhamnosus</i> GG                                                                | ATCC, VA                                                                              | 53103      |
| <b>Oligonucleotides</b>                                                                          |                                                                                       |            |
| <i>daf-2</i> F: 5'-AAAAGATTTGGCTGGTCAGAGA-3'<br><i>daf-2</i> R: 5'-TTTCAGTACAAATGAGATTGTCAGC-3'  | Obtained from bioserve<br>( <a href="https://bioserve.in/">https://bioserve.in/</a> ) |            |
| <i>daf-16</i> F: 5'-TTCAATGCAAGGAGCATTG-3'<br><i>daf-16</i> R: 5'-AGCTGGAGAAACACGAGACG-3'        |                                                                                       |            |
| <i>skn-1</i> F: 5'-CTCTCTTCTGGCATCCTCTACCA-3'<br><i>skn-1</i> R: 5'-TTCTTGGATTCTTCTTCTTGTTCGT-3' |                                                                                       |            |
| <i>sod-3</i> F: 5'-TTCAAAGGAGCTGATGGACACT-3'<br><i>sod-3</i> R: 5'-AAGTGGGACCATTCCCTTCCAA-3'     |                                                                                       |            |
| <i>hsp-16.2</i> F: 5'-GATGCTCGTGCTCTTGCTG-3'<br><i>hsp-16.2</i> R: 5'-CCGAATTGTTCTCCATCGAC-3'    |                                                                                       |            |
| <i>gst-4</i> F: 5'-CTATTTCCGTCCAGCTCAAC-3'<br><i>gst-4</i> R: 5'-TTTGTTCAACGGGCGCTTGC-3'         |                                                                                       |            |
| <i>age-1</i> F: 5'-GCTGCTCCGTGCAGAGATTG-3'<br><i>age-1</i> R: 5'-CACGGAGGTAAGCTTCCATC-3'         |                                                                                       |            |

| REAGENT/RESOURCE                                                                                  | SOURCES                                  | IDENTIFIER                                                                                                                      |
|---------------------------------------------------------------------------------------------------|------------------------------------------|---------------------------------------------------------------------------------------------------------------------------------|
| <i>dbl-1</i> F: 5'-GCCATTCTCCACCTCTTCCT-3'<br><i>dbl-1</i> R: 5'-GGAACATCAATGCTCGGACC-3'          |                                          |                                                                                                                                 |
| <i>bar-1</i> F: 5'-GACGAGATTCATCAAAACCATACAA-3'<br><i>bar-1</i> R: 5'-TACTCGGACCAGGGTTTGAT-3'     |                                          |                                                                                                                                 |
| <i>tir-1</i> F: 5'-CCGACCACCAAAGAAATGCC-3'<br><i>tir-1</i> R: 5'-CTTGGTCCACCGATGCTTCT-3'          |                                          |                                                                                                                                 |
| <i>pmk-1</i> F: 5'- ACTTCATCCGACTCCACGAG-3'<br><i>pmk-1</i> R: 5'- CAGCAGCACAAACAGTTCCA-3'        |                                          |                                                                                                                                 |
| <i>sek-1</i> F: 5'-TGCTCAACGAGCTAGACG-3'<br><i>sek-1</i> R: 5'-ATGTTCGACGGTTTCACG-3'              |                                          |                                                                                                                                 |
| <i>nsy-1</i> F: 5'-TGCGATGAACTACTACGG-3'<br><i>nsy-1</i> R: 5'-CACCCAAATGACCAAATA-3'              |                                          |                                                                                                                                 |
| <i>h1h-1</i> F: 5'-GTCACCGCAAATGACATCAC-3'<br><i>h1h-1</i> R: 5'- GGTAGGTGCAGTTGGAGCAT-3'         |                                          |                                                                                                                                 |
| <i>unc-120</i> F: 5'-TGCCCTAATGCTCCTGGTGG-3'<br><i>unc-120</i> R: 5'- GGGGCGAGAAATGGAGTGAA-3'     |                                          |                                                                                                                                 |
| <i>act-1</i> F: 5'-GCTGGACGTGATCTTACTGATTACC-3'<br><i>act-1</i> R: 5'-GTAGCAGAGCTTCTCCTTGATGTC-3' |                                          |                                                                                                                                 |
| <b>Software and tools</b>                                                                         |                                          |                                                                                                                                 |
| MedCalc v.14.8.1                                                                                  | MedCalc Software Ltd.                    | <a href="https://www.medcalc.org/">https://www.medcalc.org/</a>                                                                 |
| SPSS 16                                                                                           | IBM SPSS Statistics                      | <a href="https://www.ibm.com/products/spss-statistics">https://www.ibm.com/products/spss-statistics</a>                         |
| Excel 2016                                                                                        | Microsoft                                | <a href="https://www.microsoft.com/en-us/microsoft-365/excel">https://www.microsoft.com/en-us/microsoft-365/excel</a>           |
| PowerPoint 2016                                                                                   | Microsoft                                | <a href="https://www.microsoft.com/en-us/microsoft-365/powerpoint">https://www.microsoft.com/en-us/microsoft-365/powerpoint</a> |
| Optika ProView                                                                                    | OPTIKA Science                           | <a href="https://www.optikascience.com/optikascience/?lang=en">https://www.optikascience.com/optikascience/?lang=en</a>         |
| MEGA 11                                                                                           | Molecular Evolutionary Genetics Analysis | <a href="https://www.megasoftware.net/">https://www.megasoftware.net/</a>                                                       |
| BLAST                                                                                             | NCBI                                     | <a href="https://blast.ncbi.nlm.nih.gov/Blast.cgi">https://blast.ncbi.nlm.nih.gov/Blast.cgi</a>                                 |
| GenBank                                                                                           | NCBI                                     | <a href="https://www.ncbi.nlm.nih.gov/genbank/">https://www.ncbi.nlm.nih.gov/genbank/</a>                                       |
| ImageJ                                                                                            | NIH                                      | <a href="https://imagej.nih.gov/ij/index.html">https://imagej.nih.gov/ij/index.html</a>                                         |

## **2. MATERIALS AND METHODS**

### **2.1. Isolation, genetic identification, and characterization of probiotic bacteria**

Probiotic bacteria were isolated from traditionally fermented (natural and uncontrolled fermentation in clay pots) barnyard millet (*Echinochloa frumentacea*) samples. Briefly, about 10 g of fermented barnyard millet samples were homogeneously mixed with sterilized phosphate buffer saline (PBS; pH 6.8), and 1 mL of serially diluted samples were spread onto de Man Rogosa and Sharpe (MRS) agar plates. The plates were incubated at 37°C for 24-48 h, and the pure colonies were obtained after successive cultivation by the streak plate method. We performed Gram staining and catalase activity assay to exclude gram-negative and gas-forming bacteria, respectively, from selected isolates. The pure cultures were stored at -80°C in MRS broth containing 30% glycerol. Genus- and species-level identification of selected isolates was determined by sequencing the 16S rRNA gene. The 16S rRNA sequencing analysis was performed with universal primers (Primer\_F-GAGTTTGATCGTGGCTCAG; Primer\_R-AGGGCTACCTTGTTAGACTT). The resulting sequence data were aligned and analyzed using a basic local alignment search tool (BLAST, NCBI; <https://blast.ncbi.nlm.nih.gov/Blast.cgi>), and the identification was confirmed based on the highest hit scores. At last, the obtained sequences were submitted to GenBank (<https://www.ncbi.nlm.nih.gov/genbank/>), and accession numbers were assigned. Lists of identified bacteria were summarized in the main text **Table 1**.

### **2.2. Tolerance to different pH and bile-salts**

Tolerance to different pH and bile salts was evaluated according to the method described previously.<sup>1</sup> For low pH tolerance assay, the pH of freshly prepared MRS broth was adjusted from 2.0 to 7.0 using Hydrochloric acid (HCl) or sodium hydroxide (NaOH) and 100 µL of active cultures were resuspended in it for 3 h at 37°C. After incubation, bacterial suspensions were further serially diluted using phosphate buffer saline (PBS; pH 7.2), spread onto MRS agar plates and incubated for 48 h at 37°C. Total cell viability was enumerated by colony counting method. For the bile-salt tolerance assay, 100 µL of an overnight-grown probiotic strains were inoculated into MRS broth supplemented with 0.1, 0.2, and 0.3% (w/v) bile (Oxgall, Sigma) and incubated at 37°C for 4 h. After incubation, 50 µL of serially diluted bacterial suspension were spread onto MRS agar plates and incubated for 48 h. Total cell viability was enumerated by colony counting method. Simultaneously, low pH and bile-salt tolerance of isolated probiotic

strains were also determined by measuring the bacterial growth at 580 and 620 nm, respectively, using a UV-Vis spectrophotometer.

### 2.3. Auto- and co-aggregation abilities

The specific cell-cell interactions were determined using the auto- and co-aggregation assay according to the methodology described by Kos et al.<sup>2</sup> Overnight culture of selected probiotic strain was centrifuged at 10000 rpm for 10 min, washed twice with PBS (pH 7.2) and re-suspended in PBS to a to  $10^{-8}$  CFU/mL. The bacterial suspension was mixed by gentle vortexing for 20 s, and absorbance was measured at 600 nm ( $A_0$ ) using a UV-Vis spectrophotometer. The suspension was then incubated at 37°C for 3 h, and the absorbance of the supernatant was measured at 600 nm ( $A_t$ ). The percentage auto-aggregation was calculated as per the following formula:

$$\text{Autoaggregation (\%)} = \left( \frac{(A_0 - A_t)}{A_0} \right) \times 100$$

To examine the co-aggregation between selected isolates of probiotics and pathogens (either *Pseudomonas aeruginosa* [PA] or *Staphylococcus aureus* [SA]), an equal volume of cell suspension (1.5 mL) was mixed in pair by vortexing for 20 s, incubated for 3 h at 37°C and the absorbance of supernatant was measured at 600 nm. The percentage co-aggregation was calculated as per the following formula:

$$\text{Coaggregation (\%)} = \left( \frac{(A_{PAT} + A_{LAB}) / (2 - A_{MIX})}{(A_{PAT} + A_{LAB}) / 2} \right) \times 100$$

where the factors  $A_{PAT}$  and  $A_{LAB}$  represent the absorbance of the individual pathogen and LAB, respectively.  $A_{MIX}$  represents the absorbance of mixed bacterial suspensions after incubation. Each assay was performed at least three times for each LAB strain under similar conditions, and each experiment contained five replicates.

### 2.4. Cell surface hydrophobicity

The adhesion of LAB to xylene was used to determine its cell surface hydrophobicity<sup>3</sup>. First, stationary phase cells from LAB strains were collected by centrifugation, dissolved in 3 mL of 0.1 M  $KNO_3$ , and the absorbance at 600 nm was determined ( $A_{Control}$ ). Next, an aliquot of xylene (1 mL) was added to the cell suspension and incubated at room temperature for 10 minutes to establish phase separation (an organic phase and an aqueous phase). After vortexing,

the tubes were incubated again at room temperature for 20 minutes, and the absorbance of the aqueous phase was recorded at 600 nm ( $A_{Test}$ ). Finally, the percent cell surface hydrophobicity (CSH) was calculated using the following equation:

$$CSH (\%) = \left( \frac{A_{Control} - A_{Test}}{A_{Control}} \right) \times 100$$

Three independent biological experiments were performed, and each biological sample was analyzed with five technical replicates.

## 2.5. Antioxidant activity

### 2.5.1. DPPH radical scavenging activity assay

To examine the *in vitro* antioxidant properties of selected probiotic strains, 2, 2-diphenyl-1-picrylhydrazyl (DPPH, HiMedia) free radical quenching experiment was performed. The reaction mixture consisted of 2 mL of each probiotic strain ( $10^8$  CFU/mL) and 2 mL of DPPH solution (0.1 mM DPPH in methanol) was mixed vigorously and then the tubes were incubated for 20 min in the dark at room temperature. After incubation, decolorization of the reaction mixture was measured at 517 nm using a UV-Vis spectrophotometer (UV-1800, Shimadzu, Japan). The percentage inhibition of DPPH radicals ( $IC_{50}$ ) by probiotic strains was calculated using the following equation, and comparable with ascorbic acid.

$$DPPH \text{ radical scavenging activity } (\%) = \left( 1 - \frac{A_1}{A_2} \right) \times 100$$

Where  $A_1$  and  $A_2$  represent the absorbance of the samples and control (distilled water), respectively, mixed with DPPH solution.

### 2.5.2. Superoxide scavenging activity assay

The superoxide anion scavenging activity of probiotics was determined according to the method previously described.<sup>4</sup> Initially, the reaction mixture was prepared by mixing 0.2 M sodium phosphate buffer, 15  $\mu$ M phenazine methosulfate, 50  $\mu$ M nitrobluetetrazolium, and 75  $\mu$ M nicotinamide adenine dinucleotide (NADH). 1 mL of reaction mixture was added to 50  $\mu$ L of LAB strains and incubated at 37°C for 10 minutes. The absorbance of the samples at 560 nm was measured and the scavenging activity was calculated as,

$$Superoxide \text{ anion scavenging activity } (\%) = \left( \frac{A_1 - A_2}{A_1} \right) \times 100$$



Where  $A_1$  and  $A_2$  represent the absorbance of the control and sample, respectively. Three independent biological experiments were performed, and each biological sample was analyzed with five technical replicates.

### **2.5.3. Reducing power activity**

Reducing power activity of probiotic strains isolated from fermented barnyard miller was determined according to the method described previously.<sup>5</sup> Briefly, 0.2 mL of cell suspension was mixed with 200  $\mu$ L of 1% potassium ferricyanide and 200  $\mu$ L of 200 mM sodium phosphate buffer (pH 7.2), and the mixture was incubated for 20 min at 50°C. After incubation, the reaction mixture was centrifuged at 10,000 rpm at 4°C after adding 200  $\mu$ L of 10% (w/v) trichloroacetic acid. The supernatant (500  $\mu$ L) was mixed with 100  $\mu$ L of 0.1% ferric chloride and 400  $\mu$ L of distilled water. After 10 min incubation, the absorbance was read at 700 nm, and comparable with L-Cysteine.

### **2.5.4. Hydroxyl radical scavenging activity assay**

The hydroxyl radical scavenging activity of isolated probiotic bacteria was conducted using the method of Ding et al. (2017).<sup>6</sup> The reaction mixture was prepared as follows: 1 mL of O-phenanthroline (0.1% w/v), 1 mL of phosphate buffer saline, 1 mL of 2.5 mM ferrous sulphate ( $\text{Fe}_2\text{SO}_4$ ), and 1 mL of 20 mM hydrogen peroxide ( $\text{H}_2\text{O}_2$ ). Cell suspension (500  $\mu$ L) was mixed with reaction solution, incubated at 37°C for 2 h, and the absorbance was measured at 536 nm. The percentage of hydroxyl radical scavenging activity was calculated using the following equation;

$$\text{Scavenging activity (\%)} = \left( \frac{A_1 - A_2}{A_1 - A_0} \right) \times 100$$

Where  $A_1$  is the absorbance in the presence of  $\text{H}_2\text{O}_2$  alone,  $A_2$  is the absorbance in the presence of sample and  $\text{H}_2\text{O}_2$  and  $A_0$  is the absorbance of blank (in the absence of sample and  $\text{H}_2\text{O}_2$ ).

### **2.5.5. 2-Azinobis-(3-ethylbenzothiazoline-6-sulfonic acid) diammonium salt (ABTS) radical scavenging activity**

The ABTS radical scavenging assay was performed using 2, 2-azinobis-3-ethylbenzothiazoline-6-sulphonic acid (ABTS) as described.<sup>7</sup> The ABTS cation (ABTS<sup>+</sup>) was produced by reacting 7 mM ABTS stock solution with 5.5 mM potassium persulfate to stand in the dark for at least 6 h before use. The ABTS<sup>+</sup> solution was diluted with distilled water to an

adjusted absorbance of 0.8 at 734 nm before use. Bacterial strains (150  $\mu\text{L}$ ) were mixed with 1.35 mL of ABTS+ solution, incubated at 37°C for 10 min, and the absorbance at 734 nm was measured. The ABTS radical scavenging activity was calculated using the following formula:

$$\text{ABTS radical scavenging activity (\%)} = \left(1 - \frac{A_1}{A_2}\right) \times 100$$

Where  $A_1$  and  $A_2$  represent the absorbance of the samples and control (distilled water), respectively, mixed with ABTS+ solution. Three independent biological experiments were performed, and each biological sample was analyzed with five technical replicates.

### **2.5.6. $\beta$ - Carotene bleaching inhibitory activity**

For the  $\beta$ -carotene bleaching inhibitory activity assay, the reaction mixture ( $\beta$ -carotene-linoleic acid) was prepared by adding 3 mg  $\beta$ -carotene, 66  $\mu\text{L}$  linoleic acid, 300  $\mu\text{L}$  Tween 80, and 10 mL chloroform. The reaction mixture was then evaporated using a vacuum evaporator and diluted with distilled water (75 mL). Subsequently, 4 mL of reaction mixture were mixed with 200  $\mu\text{L}$  of LAB strains and incubated at 37°C for 2 h in the dark. The absorbance of the samples at 470 nm was measured and percentage inhibition was calculated as,

$$\beta\text{-Carotene bleaching inhibitory activity (\%)} = \left(\frac{A_{1, 2h} - A_{2, 2h}}{A_{2, 0h} - A_{2, 2h}}\right) \times 100$$

where  $A_1$  and  $A_2$  represent the absorbance of samples and control (distilled water), respectively. Three independent biological experiments were performed, and each biological sample was analyzed with five technical replicates

### **2.5.7. Inhibition of ascorbate autoxidation**

The cell-free extract of LAB strains (0.1 mL from  $10^8$  CFU  $\text{mL}^{-1}$ ) or distilled water (control) was mixed with 9.8 mL of 0.1 mL of 5 mmol/L ascorbate solution and 0.2 mol/L sodium phosphate buffer (pH 7.0). The reaction mixture was incubated at 37°C for 10 minutes. After incubation, 3 mL reaction mixture was then transferred to a cuvette and the absorbance at 265 nm was measured. Inhibition of ascorbate autoxidation was calculated as,

$$\text{Inhibition rate (\%)} = \left(\frac{A_1 - A_2}{A_1}\right) \times 100$$

Where  $A_1$  and  $A_2$  represent the absorbance of the control and sample, respectively. Three independent biological experiments were performed, and each biological sample was analyzed with five technical replicates.

## **2.6. Anti-pathogenic activity**

The anti-pathogenic activity of selected probiotic strains was tested against three human pathogens *viz.*, *Pseudomonas aeruginosa* - 422 MTCC and *Staphylococcus aureus* -96 MTCC (procured from Institute of Microbial Technology, Chandigarh, India) using agar well diffusion method. Each bacterial pathogen was spread on Muller-Hinton Agar (MHA) medium and 6 mm in diameter wells were made on plates using a cork borer. Cultures of selected probiotic strains after 24 h cultivation in MRS broth were centrifuged at 10,000 rpm for 10 min, and 100  $\mu$ L of each supernatant was added into the wells made on MHA agar plates. The plates were allowed to dry, incubated at 37°C overnight, and the diameters (mm) of the clear inhibition zone were measured.

## **2.7. Body bends**

Control and probiotic-fed worms were washed gently with M9 buffer and released on the unseeded agar plates to crawl for 5 minutes at 20°C. We then transferred individual worms (n=20 worms per experiment) to a 24-well tissue culture plate containing 1 mL M9 buffer. After 1 min recovery period, the number of body bends was scored for 30 seconds using an inverted stereo zoom microscope. The reciprocating motion of bending at the mid-body of *C. elegans* was considered a body bend.<sup>8</sup>

## **2.8. Chemotaxis behavior**

Chemotaxis assay was performed according to the Bargmann et al. method.<sup>9</sup> Briefly, the age-synchronized worms (~100 worms per treatment) were raised on plates seeded with *E. coli* OP50 or LAB strains. Day 12 adulthood stage worms were transferred to chemotaxis plates (90 mm) divided into four equal quadrants ( $A_1$ ,  $B_1$ ,  $A_2$ ,  $B_2$ ) carrying 10  $\mu$ L attractant (1 M sodium acetate) on one side ( $A_1$ ,  $A_2$ ) and 10  $\mu$ L distilled water on the other side ( $B_1$ ,  $B_2$ ). Sodium azide (25 mM, 20  $\mu$ L) was spotted on each side to paralyze the attracted worms towards the region. The worms were released at the center of plates and incubated at 20°C for 90 min, and the chemotaxis index (CI) was calculated using the following formula;

$$CI = \frac{(A_1 + A_2) - (B_1 + B_2)}{N}$$

Where  $A_1$  and  $A_2$  represent worms in the attractant region,  $B_1$  and  $B_2$  represent worms in the control region, and  $N$  represents the total number of worms. Three independent biological experiments were performed, and each biological sample was analyzed with three technical replicates.

## 2.9. Gut Health Assay

Gut health was analyzed by measuring intestinal barrier functions using blue food dye and GFP-labelled transgenic strain FT63. Wild-type worms were raised as described above in the lifespan assay. At indicated time points, worms were removed from the treatment plates and suspended for 3 h in liquid NGM containing *E. coli* OP50 mixed with blue food dye (FD&C Blue #1/Acid Blue 9; 5 % wt/v). Worms were then washed with M9 buffer, mounted on to agar padded microscopic slides, and analyzed for the presence or absence of blue food dye in the body cavity.<sup>10</sup> The gut barrier integrity was further analyzed using the transgenic strain FT63 (*dlg-1::GFP*) expressing GFP in the epithelial cell junctions. Worms carrying the *dlg-1::GFP* transgene were continuously fed *E. coli* OP50 or LAB, as indicated above. Animals were then visualized under a fluorescence microscope (BX41, Olympus, Japan), and GFP signals from epithelial cells were imaged. Intact gut integrity is represented by clearly ordered bamboo-like GFP fluorescence, and disorganization (or even disappearance) of an orderly-edged GFP fluorescence indicates loss of gut integrity. For each time point, three independent experiments were performed, each with 10-15 worms per replicate.

## 3. References

- 1 M. du Toit, C. M. A. . Franz, L. M. . Dicks, U. Schillinger, P. Haberer, B. Warlies, F. Ahrens and W. . Holzapfel, *Int. J. Food Microbiol.*, 1998, **40**, 93–104.
- 2 B. Kos, J. Šušković, S. Vuković, M. Šimpraga, J. Frece and S. Matošić, *J. Appl. Microbiol.*, 2003, **94**, 981–987.
- 3 C. Raveschot, F. Coutte, M. Frémont, M. Vaeremans, J. Dugersuren, S. Demberel, D. Drider, P. Dhulster, C. Flahaut and B. Cudennec, *Food Res. Int.*, 2020, **133**, 109201.
- 4 D. Das and A. Goyal, *LWT*, 2015, **61**, 263–268.
- 5 M.-Y. Lin and C.-L. Yen, *J. Agric. Food Chem.*, 1999, **47**, 1460–1466.
- 6 W. Ding, L. Wang, J. Zhang, W. Ke, J. Zhou, J. Zhu, X. Guo and R. Long, *J. Funct. Foods*, 2017, **35**, 481–488.
- 7 S.-H. Son, S.-J. Yang, H.-L. Jeon, H.-S. Yu, N.-K. Lee, Y.-S. Park and H.-D. Paik, *Microb. Pathog.*, 2018, **125**, 486–492.

- 8 H. Iwasa, S. Yu, J. Xue and M. Driscoll, *Aging Cell*, 2010, **9**, 490–505.  
 9 C. I. Bargmann, E. Hartwig and H. R. Horvitz, *Cell*, 1993, **74**, 515–527.  
 10 S. Gelino, J. T. Chang, C. Kumsta, X. She, A. Davis, C. Nguyen, S. Panowski and M. Hansen, *PLoS Genet.*, 2016, **12**, e1006135.

**Table S1.** Preliminary screening showing the *in vitro* probiotic attributes (Gram staining and gas formation) of isolated probiotic strains from fermented barnyard millet

| S. No. | Isolates | Probiotics                                                | Gram staining | Catalase activity |
|--------|----------|-----------------------------------------------------------|---------------|-------------------|
| 1      | PS4      | <i>Lactococcus lactis</i>                                 | +             | -                 |
| 2      | PS5      | <i>Lactococcus lactis</i>                                 | +             | -                 |
| 3      | PS7      | <i>Enterococcus faecium</i>                               | +             | -                 |
| 4      | PS8      | <i>Weissella confusa</i>                                  | +             | -                 |
| 5      | PS9      | <i>Lactococcus lactis</i>                                 | +             | -                 |
| 6      | PS10     | <i>Lactococcus lactis</i>                                 | +             | -                 |
| 7      | PS16     | <i>Weizmannia coagulans</i>                               | +             | -                 |
| 8      | PS19     | <i>Weizmannia coagulans</i>                               | +             | -                 |
| 9      | PS20     | <i>Weizmannia coagulans</i>                               | +             | -                 |
| 10     | PS21     | <i>Enterococcus faecium</i>                               | +             | -                 |
| 11     | PS22     | <i>Weizmannia coagulans</i>                               | +             | -                 |
| 12     | PS24     | <i>Weizmannia coagulans</i>                               | +             | -                 |
| 13     | PS25     | <i>Lacticaseibacillus rhamnosus</i>                       | +             | -                 |
| 14     | PS26     | <i>Lacticaseibacillus rhamnosus</i>                       | +             | -                 |
| 15     | PS27     | <i>Enterococcus italicus</i>                              | +             | -                 |
| 16     | PS28     | <i>Lacticaseibacillus rhamnosus</i>                       | +             | -                 |
| 17     | PS30     | <i>Weizmannia coagulans</i>                               | +             | -                 |
| 18     | PS31     | <i>Lacticaseibacillus rhamnosus</i>                       | +             | -                 |
| 19     | PS32     | <i>Lacticaseibacillus rhamnosus</i>                       | +             | -                 |
| 20     | PS40     | <i>Limosilactobacillus fermentum</i>                      | +             | -                 |
| 21     | PS46     | <i>Lactiplantibacillus plantarum</i>                      | +             | -                 |
| 22     | PS47     | <i>Weissella confusa</i>                                  | +             | -                 |
| 23     | PS48     | <i>Weissella confusa</i>                                  | +             | -                 |
| 24     | PS49     | <i>Lactobacillus amylovorus</i>                           | +             | -                 |
| 25     | PS52     | <i>Limosilactobacillus fermentum</i>                      | +             | -                 |
| 26     | PS55     | <i>Lactobacillus amylovorus</i>                           | +             | -                 |
| 27     | PS56     | <i>Enterococcus italicus</i>                              | +             | -                 |
| 28     | PS57     | <i>Lactiplantibacillus plantarum</i>                      | +             | -                 |
| 29     | PS60     | <i>Lactobacillus amylovorus</i>                           | +             | -                 |
| 30     | PS68     | <i>Lactobacillus amylovorus</i>                           | +             | -                 |
| 31     | PS69     | <i>Lactobacillus delbrueckii</i> subsp. <i>bulgaricus</i> | +             | -                 |
| 32     | PS70     | <i>Bacillus licheniformis</i>                             | +             | -                 |
| 33     | PS74     | <i>Bacillus licheniformis</i>                             | +             | -                 |
| 34     | PS75     | <i>Bacillus licheniformis</i>                             | +             | -                 |

|    |      |                                                           |   |   |
|----|------|-----------------------------------------------------------|---|---|
| 35 | PS77 | <i>Lactobacillus delbrueckii</i> subsp. <i>bulgaricus</i> | + | - |
| 36 | PS78 | <i>Lactobacillus delbrueckii</i> subsp. <i>bulgaricus</i> | + | - |
| 37 | PS79 | <i>Lactobacillus delbrueckii</i> subsp. <i>bulgaricus</i> | + | - |
| 38 | PS82 | <i>Pediococcus pentosaceus</i>                            | + | - |
| 39 | PS91 | <i>Pediococcus pentosaceus</i>                            | + | - |

Note: +, positive; -, negative

**Table S2.** Preliminary screening showing the *in vitro* probiotic attributes (tolerance to acid and bile salts) of isolated probiotic strains from fermented barnyard millet

| S. No. | Isolates | Acid tolerance (%) |          |          | Bile tolerance (%) |          |          |
|--------|----------|--------------------|----------|----------|--------------------|----------|----------|
|        |          | pH 5               | pH 4     | pH 3     | 0.1%               | 0.2%     | 0.3%     |
| 1      | PS4      | 63.7±1.0           | 56.4±2.6 | 52.1±3.6 | 37.8±1.6           | 33.9±2.3 | 31.3±3.6 |
| 2      | PS5      | 65.8±4.0           | 63.8±3.2 | 57.2±2.1 | 30.7±2.2           | 30.1±3.4 | 28.9±2.1 |
| 3      | PS7      | 48.4±3.5           | 45.6±2.6 | 42.9±0.6 | 52.2±3.1           | 49.2±4.2 | 48.6±1.6 |
| 4      | PS8      | 55.4±1.0           | 51.8±5.5 | 47.0±1.6 | 44.6±1.6           | 44.3±2.3 | 41.7±0.5 |
| 5      | PS9      | 42.9±2.6           | 38.4±2.6 | 34.9±0.6 | 26.0±0.5           | 24.9±2.6 | 23.5±1.6 |
| 6      | PS10     | 95.8±3.6           | 87.4±3.2 | 82.0±0.6 | 92.3±2.1           | 89.5±2.7 | 85.4±2.3 |
| 7      | PS16     | 49.5±1.5           | 46.5±4.5 | 43.7±2.6 | 24.5±1.6           | 23.1±3.1 | 22.3±1.9 |
| 8      | PS19     | 56.3±1.9           | 51.1±2.8 | 49.3±2.1 | 51.0±0.5           | 59.4±3.7 | 58.4±2.0 |
| 9      | PS20     | 41.1±2.4           | 39.8±5.5 | 37.6±1.6 | 41.1±2.6           | 40.0±3.6 | 38.7±2.1 |
| 10     | PS21     | 32.2±4.6           | 27.8±3.1 | 24.6±1.7 | 36.8±3.1           | 34.2±1.4 | 31.9±3.0 |
| 11     | PS22     | 49.7±3.2           | 46.4±2.0 | 44.3±1.0 | 40.4±2.6           | 48.8±3.6 | 47.6±1.6 |
| 12     | PS24     | 22.9±0.5           | 22.1±1.8 | 21.3±3.0 | 38.0±0.5           | 34.4±2.4 | 33.4±2.3 |
| 13     | PS25     | 46.1±2.5           | 45.0±0.6 | 44.2±1.2 | 52.0±2.5           | 50.4±0.8 | 59.3±1.6 |
| 14     | PS26     | 59.1±2.5           | 58.1±1.6 | 57.7±2.5 | 39.7±2.8           | 38.6±1.6 | 38.1±2.3 |
| 15     | PS27     | 40.8±2.8           | 38.2±0.6 | 37.7±2.8 | 42.1±3.6           | 49.5±0.9 | 48.1±3.4 |
| 16     | PS28     | 95.0±1.0           | 91.1±3.2 | 87.9±2.4 | 94.7±1.6           | 92.7±1.6 | 83.5±3.6 |
| 17     | PS30     | 23.0±1.1           | 22.6±2.6 | 21.0±2.1 | 27.2±1.8           | 24.7±0.6 | 23.2±3.7 |
| 18     | PS31     | 38.8±1.6           | 37.1±2.9 | 35.7±0.6 | 38.7±2.6           | 35.5±1.4 | 33.7±3.4 |
| 19     | PS32     | 44.8±2.3           | 44.3±5.4 | 43.5±1.6 | 41.3±3.6           | 39.5±2.1 | 31.3±2.1 |
| 20     | PS40     | 92.4±2.6           | 89.7±2.6 | 83.3±1.6 | 96.6±2.4           | 95.9±3.4 | 90.4±2.6 |
| 21     | PS46     | 23.6±2.5           | 22.3±3.4 | 20.7±1.6 | 37.7±2.1           | 35.5±2.6 | 34.7±2.1 |
| 22     | PS47     | 94.3±1.0           | 90.4±2.6 | 82.0±2.6 | 94.2±0.5           | 89.4±3.4 | 82.5±0.6 |
| 23     | PS48     | 60.7±1.5           | 59.3±3.4 | 58.1±3.5 | 44.5±2.6           | 43.4±2.1 | 43.2±0.1 |
| 24     | PS49     | 48.5±2.3           | 46.8±3.4 | 45.4±2.8 | 42.2±2.4           | 41.3±1.6 | 39.8±2.6 |
| 25     | PS52     | 41.9±1.8           | 40.6±2.6 | 38.3±1.9 | 33.4±2.6           | 31.9±1.4 | 30.7±0.6 |
| 26     | PS55     | 29.7±1.4           | 27.3±3.2 | 25.7±2.1 | 20.4±1.6           | 19.3±2.1 | 17.8±1.6 |
| 27     | PS56     | 42.2±1.9           | 39.6±0.6 | 38.3±3.2 | 37.2±1.2           | 35.5±2.4 | 34.9±2.5 |
| 28     | PS57     | 97.1±1.8           | 93.5±5.3 | 86.7±3.6 | 94.6±1.6           | 89.9±2.6 | 79.2±0.6 |
| 29     | PS60     | 95.8±2.6           | 88.8±2.6 | 84.5±4.0 | 95.0±0.6           | 82.4±2.4 | 81.6±0.1 |
| 30     | PS68     | 54.5±2.4           | 53.6±0.1 | 52.4±2.6 | 50.2±3.4           | 51.0±1.6 | 48.2±2.0 |
| 31     | PS69     | 98.5±2.6           | 93.3±1.6 | 89.0±2.1 | 88.6±5.4           | 82.4±0.9 | 83.3±2.4 |
| 32     | PS70     | 94.0±2.9           | 87.9±0.6 | 80.8±2.6 | 94.2±0.6           | 89.4±0.4 | 82.5±2.1 |
| 33     | PS74     | 48.7±2.5           | 48.1±0.1 | 47.0±3.6 | 43.5±2.9           | 43.2±0.1 | 41.4±2.3 |
| 34     | PS75     | 36.3±2.6           | 34.3±1.6 | 30.0±2.4 | 24.4±1.2           | 22.5±0.6 | 21.0±0.4 |
| 35     | PS77     | 98.0±2.4           | 93.3±3.1 | 90.2±1.6 | 90.8±0.6           | 85.9±2.4 | 84.4±0.6 |
| 36     | PS78     | 61.7±1.5           | 59.0±5.5 | 55.5±1.6 | 46.1±2.4           | 45.7±2.6 | 44.8±1.6 |

|    |      |          |          |          |          |          |          |
|----|------|----------|----------|----------|----------|----------|----------|
| 37 | PS79 | 53.8±1.6 | 52.5±2.1 | 51.9±2.0 | 36.5±1.3 | 35.5±2.4 | 33.5±1.8 |
| 38 | PS82 | 21.0±1.8 | 20.4±0.1 | 19.4±2.0 | 28.8±2.6 | 26.9±3.1 | 25.8±2.1 |
| 39 | PS91 | 96.0±1.5 | 92.3±0.1 | 91.4±0.8 | 95.1±2.3 | 90.2±5.1 | 85.9±2.6 |

**Table S3.** Preliminary screening showing the *in vitro* probiotic attributes of isolated probiotic strains from fermented barnyard millet

| S. No. | Isolates | Auto aggregation (%) | Co-aggregation (%) |                | Cell surface hydrophobicity (%) |
|--------|----------|----------------------|--------------------|----------------|---------------------------------|
|        |          |                      | with <i>Pa</i>     | with <i>Sa</i> |                                 |
| 1      | PS4      | 29.0±2.1             | 26.3±2.1           | 28.4±0.6       | 28.0±1.6                        |
| 2      | PS5      | 27.6±0.6             | 38.4±0.6           | 28.0±0.6       | 21.9±0.6                        |
| 3      | PS7      | 32.2±1.6             | 21.2±3.6           | 19.6±1.6       | 26.6±0.4                        |
| 4      | PS8      | 27.1±2.4             | 28.9±2.1           | 26.2±1.2       | 34.4±2.1                        |
| 5      | PS9      | 25.6±3.2             | 19.7±2.1           | 19.0±1.4       | 35.4±1.6                        |
| 6      | PS10     | 56.2±4.4             | 58.7±2.3           | 56.7±1.6       | 64.1±3.6                        |
| 7      | PS16     | 18.4±2.1             | 23.7±0.9           | 25.8±2.4       | 22.8±1.1                        |
| 8      | PS19     | 27.9±1.9             | 38.6±1.5           | 39.2±2.1       | 48.8±2.4                        |
| 9      | PS20     | 27.0±1.4             | 20.9±1.6           | 19.9±2.6       | 30.9±1.6                        |
| 10     | PS21     | 22.3±1.3             | 22.3±0.9           | 20.8±2.4       | 22.2±0.9                        |
| 11     | PS22     | 25.2±1.7             | 24.1±0.8           | 23.3±1.6       | 25.6±0.4                        |
| 12     | PS24     | 33.2±2.1             | 24.2±1.1           | 25.5±1.9       | 35.3±0.4                        |
| 13     | PS25     | 28.5±0.5             | 21.3±1.2           | 25.3±1.2       | 22.1±0.9                        |
| 14     | PS26     | 24.5±0.9             | 26.9±2.3           | 22.5±1.6       | 20.5±1.2                        |
| 15     | PS27     | 21.5±2.1             | 19.1±1.0           | 16.0±2.4       | 25.4±1.6                        |
| 16     | PS28     | 58.2±0.6             | 58.9±0.6           | 55.7±2.1       | 61.4±3.4                        |
| 17     | PS30     | 25.2±1.8             | 23.6±3.6           | 19.5±2.4       | 31.8±2.4                        |
| 18     | PS31     | 36.6±1.5             | 17.8±1.6           | 16.1±3.2       | 24.4±3.4                        |
| 19     | PS32     | 25.0±0.6             | 17.8±1.4           | 16.1±3.1       | 34.7±2.3                        |
| 20     | PS40     | 52.4±1.4             | 57.8±2.3           | 56.1±2.1       | 62.8±2.4                        |
| 21     | PS46     | 22.4±1.6             | 22.3±2.9           | 26.8±2.6       | 25.4±2.1                        |
| 22     | PS47     | 59.9±0.6             | 62.9±1.8           | 58.3±1.4       | 63.4±1.6                        |
| 23     | PS48     | 36.8±0.7             | 23.6±0.9           | 17.9±2.6       | 26.6±1.1                        |
| 24     | PS49     | 42.7±2.1             | 27.2±2.7           | 28.7±3.1       | 32.8±1.0                        |
| 25     | PS52     | 37.0±2.3             | 21.9±3.1           | 37.7±1.4       | 21.7±1.4                        |
| 26     | PS55     | 35.6±3.1             | 22.7±2.7           | 18.5±0.4       | 41.6±2.1                        |
| 27     | PS56     | 20.1±1.6             | 13.2±0.6           | 19.9±0.2       | 28.5±1.6                        |
| 28     | PS57     | 64.4±1.7             | 63.6±4.5           | 59.1±2.1       | 59.3±3.2                        |
| 29     | PS60     | 61.0±0.6             | 53.8±2.6           | 55.1±2.6       | 60.0±3.6                        |
| 30     | PS68     | 22.3±1.8             | 22.7±1.4           | 29.6±1.1       | 25.9±2.1                        |

|    |      |          |          |          |          |
|----|------|----------|----------|----------|----------|
| 31 | PS69 | 56.1±2.4 | 68.3±1.4 | 60.0±1.6 | 60.6±0.2 |
| 32 | PS70 | 59.9±2.9 | 63.6±1.9 | 61.1±2.1 | 61.6±1.6 |
| 33 | PS74 | 27.3±2.4 | 17.4±1.4 | 15.3±2.4 | 28.3±2.4 |
| 34 | PS75 | 33.5±3.1 | 27.1±0.9 | 21.8±1.6 | 40.2±2.1 |
| 35 | PS77 | 58.2±4.5 | 67.4±2.4 | 62.5±2.4 | 61.4±1.8 |
| 36 | PS78 | 32.9±5.4 | 27.2±2.1 | 22.1±2.1 | 20.1±1.9 |
| 37 | PS79 | 22.2±0.9 | 23.9±3.1 | 19.6±1.6 | 35.7±2.4 |
| 38 | PS82 | 28.1±0.2 | 28.0±2.6 | 23.3±3.4 | 24.4±2.1 |
| 39 | PS91 | 62.4±0.6 | 58.0±2.8 | 53.3±2.6 | 62.8±0.6 |

**Table S4.** Preliminary screening showing the *in vitro* antioxidant properties of selected isolates

| S. No. | Isolates | Antioxidant activity (% inhibition) |            |                |
|--------|----------|-------------------------------------|------------|----------------|
|        |          | DPPH                                | Superoxide | Reducing power |
| 1      | PS4      | 11.9±0.1                            | 14.3±0.3   | 10.2±0.1       |
| 2      | PS5      | 5.6±0.1                             | 11.7±0.4   | 9.3±0.2        |
| 3      | PS7      | 10.7±0.2                            | 10.4±0.2   | 10.7±0.1       |
| 4      | PS8      | 5.7±0.1                             | 5.2±0.1    | 12.3±0.1       |
| 5      | PS9      | 11.0±1.1                            | 12.1±0.4   | 12.4±1.0       |
| 6      | PS10     | 56.0±1.6                            | 56.8±2.6   | 53.0±2.6       |
| 7      | PS16     | 14.5±1.2                            | 7.9±0.1    | 1.5±2.6        |
| 8      | PS19     | 13.1±0.4                            | 12.3±1.1   | 11.2±2.6       |
| 9      | PS20     | 8.7±0.6                             | 12.0±0.6   | 19.9±1.1       |
| 10     | PS21     | 13.0±0.2                            | 8.4±0.6    | 11.9±0.3       |
| 11     | PS22     | 9.8±1.1                             | 10.2±0.6   | 12.6±0.2       |
| 12     | PS24     | 12.5±0.6                            | 12.0±1.0   | 10.7±0.3       |
| 13     | PS25     | 13.1±0.6                            | 17.3±1.2   | 9.9±0.6        |
| 14     | PS26     | 10.3±0.4                            | 8.0±1.0    | 8.7±0.9        |
| 15     | PS27     | 13.8±0.2                            | 7.9±0.2    | 5.3±0.1        |
| 16     | PS28     | 53.1±1.6                            | 53.2±2.1   | 57.8±2.4       |
| 17     | PS30     | 9.6±0.2                             | 12.3±1.6   | 10.7±0.3       |
| 18     | PS31     | 11.6±0.4                            | 11.6±1.6   | 12.6±0.2       |
| 19     | PS32     | 14.4±0.2                            | 3.9±0.1    | 10.0±1.0       |
| 20     | PS40     | 51.3±0.1                            | 58.8±2.4   | 58.0±1.0       |
| 21     | PS46     | 12.4±0.7                            | 12.0±1.0   | 3.5±0.2        |
| 22     | PS47     | 55.7±0.1                            | 56.6±2.6   | 58.5±2.1       |
| 23     | PS48     | 11.1±0.2                            | 7.0±0.1    | 10.5±0.2       |
| 24     | PS49     | 12.6±1.1                            | 11.2±0.1   | 5.7±0.1        |
| 25     | PS52     | 11.7±1.5                            | 10.2±1.1   | 8.3±0.1        |
| 26     | PS55     | 13.6±1.3                            | 7.0±1.0    | 9.7±0.2        |
| 27     | PS56     | 10.8±1.2                            | 9.9±1.1    | 5.9±0.1        |
| 28     | PS57     | 54.6±2.5                            | 55.7±2.4   | 52.5±2.1       |
| 29     | PS60     | 63.9±2.6                            | 63.9±2.3   | 61.6±0.4       |



|    |      |          |          |          |
|----|------|----------|----------|----------|
| 30 | PS68 | 14.6±0.3 | 8.0±1.0  | 8.0±0.2  |
| 31 | PS69 | 62.5±0.7 | 53.6±1.0 | 56.2±0.4 |
| 32 | PS70 | 67.4±2.5 | 54.6±1.6 | 57.1±2.4 |
| 33 | PS74 | 14.0±0.4 | 11.0±1.0 | 10.5±0.2 |
| 34 | PS75 | 15.4±0.2 | 12.0±1.0 | 5.8±0.6  |
| 35 | PS77 | 65.7±3.1 | 51.5±2.1 | 59.6±2.1 |
| 36 | PS78 | 10.8±0.2 | 8.6±0.6  | 4.2±0.1  |
| 37 | PS79 | 16.9±2.1 | 9.5±0.4  | 5.8±0.4  |
| 38 | PS82 | 13.5±0.1 | 18.6±1.1 | 5.9±0.2  |
| 39 | PS91 | 57.4±2.1 | 58.1±2.4 | 58.0±2.6 |

**Table S5.** Preliminary screening showing the *in vitro* antioxidant properties of selected isolates

| S. No. | Isolates | Antioxidant activity (% inhibition) |          |                             |                        |
|--------|----------|-------------------------------------|----------|-----------------------------|------------------------|
|        |          | Hydroxide                           | ABTS     | $\beta$ -Carotene bleaching | Ascorbate autoxidation |
| 1      | PS4      | 10.5±0.2                            | 3.6±1.1  | 7.1±1.1                     | 6.1±0.2                |
| 2      | PS5      | 9.4±0.4                             | 5.1±1.1  | 10.9±1.2                    | 5.1±0.2                |
| 3      | PS7      | 9.8±0.1                             | 11.7±1.0 | 6.1±0.2                     | 14.2±1.1               |
| 4      | PS8      | 3.4±0.1                             | 3.8±1.1  | 3.3±0.1                     | 8.8±0.2                |
| 5      | PS9      | 8.5±0.1                             | 10.6±1.2 | 10.9±0.1                    | 11.1±1.2               |
| 6      | PS10     | 67.7±0.4                            | 61.0±2.4 | 54.3±2.6                    | 60.8±0.2               |
| 7      | PS16     | 9.1±0.3                             | 9.3±1.2  | 12.3±1.1                    | 11.8±0.2               |
| 8      | PS19     | 6.8±0.2                             | 8.4±1.6  | 4.8±0.2                     | 10.9±0.1               |
| 9      | PS20     | 7.5±0.1                             | 12.7±1.2 | 6.3±0.1                     | 11.6±0.4               |
| 10     | PS21     | 6.5±0.3                             | 9.9±1.4  | 5.8±0.1                     | 7.4±0.2                |
| 11     | PS22     | 5.0±0.0                             | 8.6±0.3  | 15.2±2.1                    | 6.1±1.1                |
| 12     | PS24     | 7.5±0.1                             | 8.4±2.1  | 11.3±1.1                    | 6.6±0.2                |
| 13     | PS25     | 4.3±0.3                             | 10.7±1.1 | 14.4±1.2                    | 13.2±2.1               |
| 14     | PS26     | 13.9±0.1                            | 8.6±1.6  | 6.7±0.2                     | 6.1±0.1                |
| 15     | PS27     | 8.7±0.6                             | 7.7±2.1  | 5.2±0.1                     | 8.2±2.1                |
| 16     | PS28     | 50.0±2.1                            | 59.3±3.1 | 52.3±2.6                    | 57.5±2.4               |
| 17     | PS30     | 10.2±0.3                            | 7.0±1.1  | 6.0±2.1                     | 9.6±1.6                |
| 18     | PS31     | 11.6±0.1                            | 12.7±1.2 | 6.7±0.1                     | 10.2±1.4               |
| 19     | PS32     | 10.8±0.2                            | 7.5±0.5  | 5.0±2.1                     | 12.5±1.1               |
| 20     | PS40     | 56.7±2.4                            | 54.9±2.3 | 63.9±2.3                    | 58.2±2.6               |
| 21     | PS46     | 11.4±1.5                            | 12.4±0.4 | 7.1±0.1                     | 9.9±0.5                |
| 22     | PS47     | 52.3±1.2                            | 58.2±1.6 | 10.9±0.7                    | 60.7±2.4               |
| 23     | PS48     | 15.0±0.5                            | 7.5±0.5  | 11.3±1.2                    | 7.3±0.4                |
| 24     | PS49     | 9.7±1.2                             | 7.6±0.6  | 10.8±1.4                    | 10.1±1.1               |
| 25     | PS52     | 13.5±0.6                            | 9.2±1.1  | 8.5±1.3                     | 6.7±0.4                |
| 26     | PS55     | 12.8±2.1                            | 6.1±1.1  | 7.1±2.1                     | 11.1±0.2               |
| 27     | PS56     | 9.5±0.1                             | 8.3±0.2  | 13.0±2.0                    | 5.8±0.1                |
| 28     | PS57     | 55.9±2.3                            | 58.1±1.2 | 54.7±1.6                    | 58.1±2.1               |
| 29     | PS60     | 53.6±1.1                            | 61.9±0.6 | 65.6±2.4                    | 61.9±2.7               |

|    |      |          |          |          |          |
|----|------|----------|----------|----------|----------|
| 30 | PS68 | 9.6±0.6  | 9.4±1.3  | 10.8±1.1 | 12.1±0.2 |
| 31 | PS69 | 58.7±1.1 | 61.5±1.2 | 53.0±0.8 | 62.9±1.6 |
| 32 | PS70 | 51.9±0.1 | 60.3±2.3 | 40.7±2.4 | 64.9±2.4 |
| 33 | PS74 | 10.2±2.1 | 11.4±1.6 | 13.0±1.6 | 8.9±0.1  |
| 34 | PS75 | 7.0±0.2  | 10.4±1.4 | 6.4±0.2  | 12.9±2.1 |
| 35 | PS77 | 58.1±0.4 | 60.7±2.6 | 54.3±2.4 | 63.2±2.4 |
| 36 | PS78 | 6.8±0.3  | 5.8±2.4  | 7.0±0.2  | 8.3±0.2  |
| 37 | PS79 | 13.6±0.2 | 9.4±2.1  | 10.2±0.1 | 14.4±0.2 |
| 38 | PS82 | 3.8±0.2  | 5.9±2.4  | 15.0±0.6 | 11.0±0.4 |
| 39 | PS91 | 53.7±2.5 | 54.9±2.1 | 54.1±1.6 | 57.4±2.6 |

**Table S6.** The initial assessment demonstrated the *in vitro* anti-pathogenic activities of the probiotic strains isolated from fermented barnyard millet

| S. No. | Isolates | Inhibition Zone (mm) |                  |
|--------|----------|----------------------|------------------|
|        |          | <i>P. aeruginosa</i> | <i>S. aureus</i> |
| 1      | PS4      | 2.0±0.9              | 2.3±0.7          |
| 2      | PS5      | 2.6±0.6              | 2.3±1.6          |
| 3      | PS7      | 0.0±0.0              | 0.0±0.0          |
| 4      | PS8      | 2.0±1.2              | 2.0±1.0          |
| 5      | PS9      | 2.0±1.3              | 0.0±0.0          |
| 6      | PS10     | 6.3±0.5              | 6.7±0.5          |
| 7      | PS16     | 0.0±0.0              | 2.0±0.5          |
| 8      | PS19     | 3.6±1.5              | 3.3±1.6          |
| 9      | PS20     | 2.0±1.4              | 2.3±1.0          |
| 10     | PS21     | 0.0±0.0              | 0.0±0.0          |
| 11     | PS22     | 3.0±1.1              | 3.6±1.6          |
| 12     | PS24     | 2.3±0.5              | 2.0±1.8          |
| 13     | PS25     | 2.0±0.4              | 0.0±0.6          |
| 14     | PS26     | 0.0±0.0              | 2.0±0.6          |
| 15     | PS27     | 3.0±1.6              | 3.0±1.0          |
| 16     | PS28     | 7.6±1.6              | 6.3±1.9          |
| 17     | PS30     | 3.3±0.6              | 3.0±1.6          |
| 18     | PS31     | 2.0±1.7              | 0.0±0.0          |
| 19     | PS32     | 2.0±0.6              | 3.0±0.7          |
| 20     | PS40     | 7.6±1.6              | 7.3±0.9          |
| 21     | PS46     | 0.0±0.0              | 0.0±0.0          |
| 22     | PS47     | 6.3±0.7              | 6.6±0.6          |
| 23     | PS48     | 0.0±0.0              | 2.0±1.8          |
| 24     | PS49     | 3.0±0.6              | 2.0±0.6          |
| 25     | PS52     | 2.3±1.2              | 0.0±0.0          |
| 26     | PS55     | 3.0±0.6              | 2.6±0.8          |
| 27     | PS56     | 0.0±0.0              | 2.0±1.0          |
| 28     | PS57     | 8.0±1.7              | 7.0±0.0          |
| 29     | PS60     | 6.6±1.5              | 6.3±0.5          |
| 30     | PS68     | 2.0±1.8              | 3.0±0.0          |

|    |      |         |         |
|----|------|---------|---------|
| 31 | PS69 | 6.2±0.4 | 7.2±0.7 |
| 32 | PS70 | 8.3±1.3 | 8.0±0.2 |
| 33 | PS74 | 2.6±0.5 | 3.0±0.6 |
| 34 | PS75 | 0.0±0.0 | 2.0±0.0 |
| 35 | PS77 | 6.3±0.6 | 7.0±0.9 |
| 36 | PS78 | 3.0±0.6 | 2.0±1.0 |
| 37 | PS79 | 2.3±1.0 | 0.0±0.0 |
| 38 | PS82 | 0.0±0.0 | 2.0±0.3 |
| 39 | PS91 | 8.3±0.7 | 7.0±1.2 |

**Table S7.** Lifespan analyses – Monocultures

| Conditions                                     |      | MS<br>(days±SEM) | N   | Censored | % Change  | p Value |
|------------------------------------------------|------|------------------|-----|----------|-----------|---------|
| <i>E. coli</i>                                 | OP50 | 20.189±0.422     | 163 | 11       |           |         |
| <i>B. licheniformis</i> (BL)                   | PS70 | 22.834±0.467     | 139 | 5        | (+) 13.10 | <0.0001 |
| <i>B. licheniformis</i> (BL)                   | PS74 | 20.867±0.504     | 143 | 0        | (+) 3.4   | 0.0698  |
| <i>B. licheniformis</i> (BL)                   | PS75 | 21.175±0.498     | 154 | 5        | (+) 4.88  | 0.0572  |
| <i>E. faecium</i> (EF)                         | PS7  | 20.216±0.481     | 141 | 9        | (+) 0.14  | 0.3164  |
| <i>E. faecium</i> (EF)                         | PS21 | 20.052±0.487     | 150 | 15       | (-) 0.68  | 0.5002  |
| <i>E. italicus</i> (EI)                        | PS27 | 19.070±0.0494    | 125 | 2        | (-) 5.54  | 0.3040  |
| <i>E. italicus</i> (EI)                        | PS56 | 21.119±0.566     | 130 | 2        | (+) 4.61  | 0.0642  |
| <i>L. rhamnosus</i> (LR)                       | PS25 | 19.189±0.447     | 140 | 8        | (-) 4.95  | 0.1148  |
| <i>L. rhamnosus</i> (LR)                       | PS26 | 20.602±0.397     | 170 | 14       | (+) 2.05  | 0.8592  |
| <i>L. rhamnosus</i> (LR)                       | PS28 | 23.183±0.532     | 136 | 7        | (+) 14.83 | <0.0001 |
| <i>L. rhamnosus</i> (LR)                       | PS31 | 20.666±0.507     | 153 | 10       | (+) 2.36  | 0.0654  |
| <i>L. rhamnosus</i> (LR)                       | PS32 | 21.060±0.382     | 180 | 11       | (+) 4.31  | 0.2132  |
| <i>L. plantarum</i> (LP)                       | PS46 | 21.237±0.506     | 127 | 3        | (+) 5.19  | 0.0385  |
| <i>L. plantarum</i> (LP)                       | PS57 | 22.896±0.592     | 134 | 12       | (+) 13.41 | <0.0001 |
| <i>L. amylovorus</i> (LA)                      | PS49 | 20.652±0.579     | 125 | 8        | (+) 2.29  | 0.0853  |
| <i>L. amylovorus</i> (LA)                      | PS55 | 21.877±0.494     | 146 | 11       | (+) 8.36  | 0.0005  |
| <i>L. amylovorus</i> (LA)                      | PS60 | 23.311±0.661     | 130 | 10       | (+) 15.46 | <0.0001 |
| <i>L. amylovorus</i> (LA)                      | PS68 | 21.579±0.491     | 137 | 10       | (+) 6.87  | 0.0013  |
| <i>L. delbrueckii</i> subsp. <i>bulgaricus</i> | PS69 | 21.721±0.510     | 135 | 5        | (+) 12.54 | <0.0001 |
| <i>L. delbrueckii</i> subsp. <i>bulgaricus</i> | PS77 | 22.730±0.524     | 131 | 4        | (+) 12.59 | <0.0001 |
| <i>L. delbrueckii</i> subsp. <i>bulgaricus</i> | PS78 | 21.363±0.546     | 132 | 4        | (+) 5.82  | 0.0026  |
| <i>L. delbrueckii</i> subsp. <i>bulgaricus</i> | PS79 | 21.136±0.553     | 140 | 8        | (+) 4.69  | 0.0086  |
| <i>L. lactis</i> (LL)                          | PS4  | 21.024±0.426     | 156 | 10       | (+) 4.14  | 0.1499  |
| <i>L. lactis</i> (LL)                          | PS5  | 20.289±0.477     | 140 | 6        | (+) 0.50  | 0.5494  |
| <i>L. lactis</i> (LL)                          | PS9  | 20.239±0.440     | 150 | 9        | (+) 0.25  | 0.6914  |
| <i>L. lactis</i> (LL)                          | PS10 | 22.984±0.491     | 142 | 10       | (+) 9.91  | <0.0001 |
| <i>L. fermentum</i> (LF)                       | PS40 | 25.468±0.481     | 153 | 8        | (+) 26.15 | <0.0001 |
| <i>L. fermentum</i> (LF)                       | PS52 | 20.909±0.441     | 139 | 2        | (+) 3.57  | 0.3352  |
| <i>P. pentosaceus</i> (PP)                     | PS82 | 21.667±0.400     | 164 | 14       | (+) 7.32  | 0.0623  |
| <i>P. pentosaceus</i> (PP)                     | PS91 | 25.026±0.494     | 154 | 8        | (+) 23.96 | <0.0001 |
| <i>W. confusa</i> (WC)                         | PS8  | 20.389±0.444     | 146 | 10       | (+) 0.99  | 0.8146  |
| <i>W. confusa</i> (WC)                         | PS47 | 24.541±0.515     | 151 | 12       | (+) 21.56 | <0.0001 |
| <i>W. confusa</i> (WC)                         | PS48 | 21.847±0.412     | 155 | 12       | (+) 8.21  | 0.0754  |

| Conditions                |      | MS<br>(days±SEM) | N   | Censored | % Change | p Value |
|---------------------------|------|------------------|-----|----------|----------|---------|
| <i>W. coagulans</i> (WzC) | PS16 | 20.209±0.434     | 169 | 9        | (+) 0.10 | 0.5267  |
| <i>W. coagulans</i> (WzC) | PS19 | 20.399±0.497     | 157 | 6        | (+) 1.04 | 0.0719  |
| <i>W. coagulans</i> (WzC) | PS20 | 21.255±0.410     | 174 | 10       | (+) 5.28 | 0.1229  |
| <i>W. coagulans</i> (WzC) | PS22 | 20.117±0.403     | 166 | 8        | (-) 0.36 | 0.9636  |
| <i>W. coagulans</i> (WzC) | PS24 | 20.994±0.431     | 153 | 7        | (+) 3.99 | 0.3798  |
| <i>W. coagulans</i> (WzC) | PS30 | 20.302±0.421     | 177 | 14       | (+) 0.56 | 0.8005  |

**Table S8.** Lifespan analyses – Pair-wise combinations

| Conditions          |             | MS<br>(days±SEM) | N   | Censored | %<br>Change | <i>p</i><br>Value |
|---------------------|-------------|------------------|-----|----------|-------------|-------------------|
| <i>E. coli</i> OP50 | Control     | 19.55±0.402      | 159 | 6        |             |                   |
| BL PS70+LR PS28     | Cocktail 1  | 23.95±0.514      | 178 | 10       | (+) 22.94   | 0.0001            |
| BL PS70+LP PS57     | Cocktail 2  | 23.53±0.483      | 164 | 15       | (+) 20.70   | 0.0001            |
| BL PS70+LA PS60     | Cocktail 3  | 21.66±0.533      | 172 | 11       | (+) 11.15   | 0.0001            |
| BL PS70+LB PS77     | Cocktail 4  | 23.16±0.495      | 178 | 8        | (+) 18.85   | 0.0001            |
| BL PS70+LL PS10     | Cocktail 5  | 22.16±0.525      | 154 | 5        | (+) 13.72   | 0.0001            |
| BL PS70+LF PS40     | Cocktail 6  | 23.09±0.539      | 168 | 16       | (+) 18.44   | 0.0001            |
| BL PS70+PP PS91     | Cocktail 7  | 22.86±0.572      | 141 | 6        | (+) 17.31   | 0.0001            |
| BL PS70+WC PS47     | Cocktail 8  | 22.28±0.528      | 157 | 11       | (+) 16.90   | 0.0001            |
| <i>E. coli</i> OP50 |             | 19.63±0.402      | 158 | 10       |             |                   |
| LR PS28+LP PS57     | Cocktail 9  | 22.48±0.486      | 148 | 13       | (+) 14.52   | 0.0001            |
| LR PS28+LA PS60     | Cocktail 10 | 22.57±0.460      | 174 | 8        | (+) 14.93   | 0.0001            |
| LR PS28+LB PS77     | Cocktail 11 | 21.67±0.504      | 157 | 15       | (+) 10.39   | 0.0001            |
| LR PS28+LL PS10     | Cocktail 12 | 21.16±0.434      | 164 | 11       | (+) 7.79    | 0.0001            |
| LR PS28+LF PS40     | Cocktail 13 | 22.10±0.420      | 173 | 13       | (+) 12.60   | 0.0001            |
| LR PS28+PP PS91     | Cocktail 14 | 21.74±0.467      | 153 | 10       | (+) 10.75   | 0.0001            |
| LR PS28+WC PS47     | Cocktail 15 | 22.20±0.520      | 148 | 8        | (+) 13.09   | 0.0001            |
| <i>E. coli</i> OP50 |             | 19.70±0.441      | 151 | 12       |             |                   |
| LP PS57+LA PS60     | Cocktail 16 | 24.683±0.562     | 148 | 7        | (+) 29.39   | 0.0001            |
| LP PS57+LB PS77     | Cocktail 17 | 22.35±0.446      | 166 | 10       | (+) 13.48   | 0.0001            |
| LP PS57+LL PS10     | Cocktail 18 | 22.75±0.416      | 149 | 12       | (+) 15.51   | 0.0001            |
| LP PS57+LF PS40     | Cocktail 19 | 22.70±0.426      | 158 | 8        | (+) 15.26   | 0.0001            |
| LP PS57+PP PS91     | Cocktail 20 | 22.60±0.419      | 175 | 20       | (+) 14.75   | 0.0001            |
| LP PS57+WC PS47     | Cocktail 21 | 21.72±0.410      | 150 | 14       | (+) 10.28   | 0.0014            |
| <i>E. coli</i> OP50 |             | 19.29±0.345      | 160 | 11       |             |                   |
| LA PS60+LB PS77     | Cocktail 22 | 22.34±0.381      | 153 | 14       | (+) 15.81   | 0.0001            |
| LA PS60+LL PS10     | Cocktail 23 | 21.76±0.491      | 161 | 12       | (+) 12.80   | 0.0001            |
| LA PS60+LF PS40     | Cocktail 24 | 22.20±0.440      | 173 | 15       | (+) 15.09   | 0.0001            |
| LA PS60+PP PS91     | Cocktail 25 | 22.22±0.406      | 158 | 10       | (+) 15.19   | 0.0001            |
| LA PS60+WC PS47     | Cocktail 26 | 22.00±0.378      | 163 | 11       | (+) 14.05   | 0.0001            |
| <i>E. coli</i> OP50 |             | 19.29±0.345      | 160 | 11       |             |                   |
| LB PS77+LL PS10     | Cocktail 27 | 23.670±0.511     | 158 | 10       | (+) 22.71   | 0.0001            |

| Conditions          |             | MS<br>(days±SEM) | N   | Censored | %<br>Change | <i>p</i><br>Value |
|---------------------|-------------|------------------|-----|----------|-------------|-------------------|
| LB PS77+LF PS40     | Cocktail 28 | 21.81±0.415      | 166 | 9        | (+) 13.06   | 0.0001            |
| LB PS77+PP PS91     | Cocktail 29 | 21.75±0.365      | 164 | 12       | (+) 12.75   | 0.0001            |
| LB PS77+WC PS47     | Cocktail 30 | 21.67±0.386      | 159 | 8        | (+) 12.34   | 0.0001            |
| <i>E. coli</i> OP50 |             | 19.29±0.345      | 160 | 11       |             |                   |
| LL PS10+LF PS40     | Cocktail 31 | 21.45±0.375      | 152 | 8        | (+) 11.20   | 0.0001            |
| LL PS10+PP PS91     | Cocktail 32 | 21.07±0.381      | 175 | 12       | (+) 9.23    | 0.0001            |
| LL PS10+WC PS47     | Cocktail 33 | 20.98±0.400      | 170 | 7        | (+) 8.76    | 0.0001            |
| <i>E. coli</i> OP50 |             | 19.29±0.345      | 160 | 11       |             |                   |
| LF PS40+PP PS91     | Cocktail 34 | 21.39±0.386      | 147 | 9        | (+) 10.89   | 0.0001            |
| LF PS40+WC PS47     | Cocktail 35 | 22.31±0.430      | 158 | 11       | (+) 15.66   | 0.0001            |
| <i>E. coli</i> OP50 |             | 19.29±0.345      | 160 | 11       |             |                   |
| PP PS91+WC PS47     | Cocktail 36 | 22.90±0.417      | 165 | 13       | (+) 18.71   | 0.0001            |

**Table S9.** Lifespan analyses – Three-way combinations

| Conditions                             |             | MS<br>(days±SEM) | N   | Censored | %<br>Change | <i>p</i><br>Value |
|----------------------------------------|-------------|------------------|-----|----------|-------------|-------------------|
| <i>E. coli</i> OP50                    |             | 19.63±0.405      | 163 | 6        |             |                   |
| PS70+PS28+PS57                         | Cocktail 37 | 21.71±0.451      | 169 | 7        | (+) 10.60   | 0.0001            |
| PS70+PS28+PS60                         | Cocktail 38 | 21.35±0.427      | 158 | 10       | (+) 8.76    | 0.0005            |
| PS70+PS28+PS77                         | Cocktail 39 | 22.39±0.434      | 165 | 12       | (+) 14.06   | 0.0001            |
| PS70+PS28+PS10                         | Cocktail 40 | 22.50±0.412      | 172 | 10       | (+) 14.62   | 0.0001            |
| PS70+PS28+PS40                         | Cocktail 41 | 21.90±0.420      | 151 | 9        | (+) 11.56   | 0.0001            |
| PS70+PS28+PS91                         | Cocktail 42 | 22.92±0.402      | 158 | 12       | (+) 16.84   | 0.0001            |
| PS70+PS28+PS47                         | Cocktail 43 | 23.12±0.394      | 156 | 14       | (+) 17.78   | 0.0001            |
| PS70+PS57+PS60                         | Cocktail 44 | 21.77±0.396      | 173 | 9        | (+) 10.90   | 0.0001            |
| PS70+PS57+PS77                         | Cocktail 45 | 22.04±0.390      | 158 | 10       | (+) 12.28   | 0.0001            |
| PS70+PS57+PS10                         | Cocktail 46 | 22.86±0.372      | 155 | 7        | (+) 16.45   | 0.0001            |
| PS70+PS57+PS40                         | Cocktail 47 | 23.23±0.395      | 162 | 11       | (+) 18.34   | 0.0001            |
| PS70+PS57+PS91                         | Cocktail 48 | 22.11±0.386      | 160 | 9        | (+) 12.79   | 0.0001            |
| PS70+PS57+PS47                         | Cocktail 49 | 22.21±0.381      | 153 | 7        | (+) 12.58   | 0.0001            |
| PS70+PS60+PS77                         | Cocktail 50 | 22.79±0.405      | 148 | 6        | (+) 16.10   | 0.0001            |
| PS70+PS60+PS10                         | Cocktail 51 | 21.99±0.388      | 162 | 7        | (+) 12.02   | 0.0002            |
| PS70+PS60+PS40                         | Cocktail 52 | 22.98±0.428      | 167 | 11       | (+) 17.01   | 0.0001            |
| PS70+PS60+PS91                         | Cocktail 53 | 22.80±0.407      | 169 | 6        | (+) 16.15   | 0.0001            |
| PS70+PS60+PS47                         | Cocktail 54 | 22.91±0.430      | 154 | 5        | (+) 16.71   | 0.0001            |
| PS70+PS77+PS60<br>(Embryo)             | Cocktail 55 | 28.693±0.507     | 171 | 10       | (+) 46.8    | 0.0001            |
| PS70+PS77+PS60<br>(Young adult)        | Cocktail 55 | 24.771±0.517     | 170 | 8        | (+) 26.2    | 0.0001            |
| PS70+PS77+PS60<br>(Embryo-Young adult) | Cocktail 55 | 21.068±0.368     | 156 | 7        | (+) 7.3     | 0.0627            |
| PS70+PS77+PS40                         | Cocktail 56 | 23.25±0.453      | 175 | 16       | (+) 18.44   | 0.0001            |
| PS70+PS77+PS91                         | Cocktail 57 | 21.84±0.400      | 180 | 14       | (+) 11.26   | 0.0001            |
| PS70+PS77+PS47                         | Cocktail 58 | 22.01±0.388      | 160 | 9        | (+) 12.12   | 0.0001            |
| PS70+PS10+PS40                         | Cocktail 59 | 22.56±0.425      | 161 | 10       | (+) 14.88   | 0.0001            |

| Conditions          |              | MS<br>(days±SEM) | N   | Censored | %<br>Change | p<br>Value |
|---------------------|--------------|------------------|-----|----------|-------------|------------|
| PS70+PS10+PS91      | Cocktail 60  | 22.77±0.395      | 167 | 12       | (+) 16.00   | 0.0001     |
| PS70+PS10+PS47      | Cocktail 61  | 21.79±0.419      | 156 | 10       | (+) 11.00   | 0.0001     |
| PS70+PS40+PS91      | Cocktail 62  | 22.60±0.488      | 153 | 9        | (+) 15.13   | 0.0001     |
| PS70+PS40+PS47      | Cocktail 63  | 22.14±0.452      | 171 | 17       | (+) 12.79   | 0.0001     |
| PS70+PS91+PS47      | Cocktail 64  | 22.76±0.466      | 160 | 15       | (+) 15.94   | 0.0001     |
| <i>E. coli</i> OP50 |              | 19.58±0.394      | 164 | 6        |             |            |
| PS28+PS57+PS60      | Cocktail 65  | 22.44±0.416      | 174 | 9        | (+) 14.2    | 0.0001     |
| PS28+PS57+PS77      | Cocktail 66  | 23.46±0.465      | 153 | 12       | (+) 19.93   | 0.0001     |
| PS28+PS57+PS10      | Cocktail 67  | 22.62±0.431      | 162 | 16       | (+) 15.64   | 0.0001     |
| PS28+PS57+PS40      | Cocktail 68  | 22.24±0.444      | 164 | 19       | (+) 13.70   | 0.0001     |
| PS28+PS57+PS91      | Cocktail 69  | 22.82±0.458      | 168 | 17       | (+) 16.67   | 0.0001     |
| PS28+PS57+PS47      | Cocktail 70  | 22.79±0.453      | 171 | 14       | (+) 16.51   | 0.0001     |
| PS28+PS60+PS77      | Cocktail 71  | 22.53±0.454      | 169 | 16       | (+) 15.18   | 0.0001     |
| PS28+PS60+PS10      | Cocktail 72  | 23.21±0.408      | 158 | 14       | (+) 18.66   | 0.0001     |
| PS28+PS60+PS40      | Cocktail 73  | 23.09±0.427      | 167 | 11       | (+) 18.07   | 0.0001     |
| PS28+PS60+PS91      | Cocktail 74  | 22.26±0.440      | 156 | 9        | (+) 13.81   | 0.0001     |
| PS28+PS60+PS47      | Cocktail 75  | 22.81±0.422      | 166 | 11       | (+) 16.62   | 0.0001     |
| PS28+PS77+PS10      | Cocktail 76  | 22.90±0.455      | 159 | 13       | (+) 17.02   | 0.0001     |
| PS28+PS77+PS40      | Cocktail 77  | 23.52±0.452      | 165 | 10       | (+) 18.87   | 0.0001     |
| PS28+PS77+PS91      | Cocktail 78  | 23.14±0.465      | 157 | 11       | (+) 18.30   | 0.0001     |
| PS28+PS77+PS47      | Cocktail 79  | 22.88±0.497      | 151 | 14       | (+) 16.97   | 0.0001     |
| PS28+PS10+PS40      | Cocktail 80  | 23.20±0.469      | 162 | 13       | (+) 18.61   | 0.0001     |
| PS28+PS10+PS91      | Cocktail 81  | 22.55±0.467      | 155 | 10       | (+) 15.29   | 0.0001     |
| PS28+PS10+PS47      | Cocktail 82  | 23.28±0.466      | 151 | 12       | (+) 19.02   | 0.0001     |
| PS28+PS40+PS91      | Cocktail 83  | 22.07±0.459      | 157 | 14       | (+) 12.83   | 0.0001     |
| PS28+PS40+PS47      | Cocktail 84  | 22.72±0.462      | 153 | 12       | (+) 16.16   | 0.0001     |
| PS28+PS91+PS47      | Cocktail 85  | 23.07±0.454      | 162 | 17       | (+) 17.94   | 0.0001     |
| <i>E. coli</i> OP50 |              | 19.74±0.391      | 168 | 7        |             |            |
| PS57+PS60+PS77      | Cocktail 86  | 23.17±0.435      | 161 | 11       | (+) 17.22   | 0.0001     |
| PS57+PS60+PS10      | Cocktail 87  | 22.68±0.462      | 160 | 13       | (+) 14.89   | 0.0001     |
| PS57+PS60+PS40      | Cocktail 88  | 22.10±0.475      | 156 | 12       | (+) 11.96   | 0.0001     |
| PS57+PS60+PS91      | Cocktail 89  | 22.61±0.473      | 154 | 13       | (+) 14.54   | 0.0001     |
| PS57+PS60+PS47      | Cocktail 90  | 22.40±0.499      | 164 | 10       | (+) 13.48   | 0.0001     |
| PS57+PS77+PS10      | Cocktail 91  | 22.87±0.467      | 152 | 7        | (+) 15.86   | 0.0001     |
| PS57+PS77+PS40      | Cocktail 92  | 23.53±0.491      | 158 | 9        | (+) 19.20   | 0.0001     |
| PS57+PS77+PS91      | Cocktail 93  | 22.59±0.501      | 169 | 11       | (+) 14.44   | 0.0001     |
| PS57+PS77+PS47      | Cocktail 94  | 22.79±0.498      | 162 | 10       | (+) 15.45   | 0.0001     |
| PS57+PS10+PS40      | Cocktail 95  | 23.29±0.482      | 145 | 7        | (+) 17.98   | 0.0001     |
| PS57+PS10+PS91      | Cocktail 96  | 23.41±0.508      | 147 | 10       | (+) 18.59   | 0.0001     |
| PS57+PS10+PS47      | Cocktail 97  | 22.07±0.440      | 155 | 9        | (+) 11.80   | 0.0001     |
| PS57+PS40+PS91      | Cocktail 98  | 22.88±0.480      | 157 | 13       | (+) 15.59   | 0.0001     |
| PS57+PS40+PS47      | Cocktail 99  | 23.37±0.371      | 145 | 9        | (+) 18.39   | 0.0001     |
| PS57+PS91+PS47      | Cocktail 100 | 21.17±0.447      | 163 | 15       | (+) 7.24    | 0.0036     |
| <i>E. coli</i> OP50 |              | 19.39±0.414      | 162 | 6        |             |            |
| PS60+PS77+PS10      | Cocktail 101 | 21.08±0.414      | 168 | 12       | (+) 8.75    | 0.0008     |
| PS60+PS77+PS40      | Cocktail 102 | 21.93±0.366      | 163 | 10       | (+) 13.10   | 0.0001     |
| PS60+PS77+PS91      | Cocktail 103 | 22.65±0.420      | 172 | 23       | (+) 16.81   | 0.0001     |
| PS60+PS77+PS47      | Cocktail 104 | 22.57±0.489      | 168 | 8        | (+) 16.43   | 0.0001     |

| Conditions                             |              | MS<br>(days±SEM) | N   | Censored | %<br>Change | <i>p</i><br>Value |
|----------------------------------------|--------------|------------------|-----|----------|-------------|-------------------|
| PS60+PS10+PS40                         | Cocktail 105 | 22.40±0.529      | 158 | 15       | (+) 15.52   | 0.0001            |
| PS60+PS10+PS91                         | Cocktail 106 | 22.46±0.565      | 136 | 6        | (+) 15.83   | 0.0001            |
| PS60+PS10+PS47                         | Cocktail 107 | 22.29±0.484      | 145 | 12       | (+) 14.96   | 0.0001            |
| PS60+PS40+PS91                         | Cocktail 108 | 21.53±0.502      | 155 | 14       | (+) 11.04   | 0.0001            |
| PS60+PS40+PS47                         | Cocktail 109 | 22.20±0.520      | 148 | 10       | (+) 14.49   | 0.0001            |
| PS60+PS91+PS47                         | Cocktail 110 | 22.87±0.430      | 161 | 13       | (+) 17.95   | 0.0001            |
| <i>E. coli</i> OP50                    |              | 19.42±0.353      | 162 | 10       |             |                   |
| PS77+PS10+PS40                         | Cocktail 111 | 22.48±0.433      | 161 | 12       | (+) 15.62   | 0.0001            |
| PS77+PS10+PS91<br>(Embryo)             | Cocktail 112 | 29.74±0.531      | 175 | 15       | (+) 53.1    | 0.0001            |
| PS77+PS10+PS91<br>(Young adult)        | Cocktail 112 | 25.91±0.539      | 150 | 2        | (+) 33.4    | 0.0001            |
| PS77+PS10+PS91<br>(Embryo-Young adult) | Cocktail 112 | 20.73±0.422      | 162 | 10       | (+) 6.7     | 0.0016            |
| PS77+PS10+PS47                         | Cocktail 113 | 21.73±0.403      | 152 | 9        | (+) 12.20   | 0.0001            |
| PS77+PS40+PS91                         | Cocktail 114 | 22.05±0.423      | 170 | 13       | (+) 13.54   | 0.0001            |
| PS77+PS40+PS47                         | Cocktail 115 | 21.75±0.365      | 164 | 8        | (+) 12.00   | 0.0001            |
| PS77+PS91+PS47                         | Cocktail 116 | 22.64±0.384      | 181 | 14       | (+) 16.58   | 0.0001            |
| <i>E. coli</i> OP50                    |              | 19.42±0.353      | 162 | 10       |             |                   |
| PS10+PS40+PS91                         | Cocktail 117 | 22.04±0.427      | 151 | 10       | (+) 13.49   | 0.0001            |
| PS10+PS40+PS47                         | Cocktail 118 | 23.02±0.377      | 158 | 8        | (+) 18.54   | 0.0001            |
| PS10+PS91+PS47                         | Cocktail 119 | 22.05±0.384      | 159 | 9        | (+) 13.54   | 0.0001            |
| PS40+PS91+PS47                         | Cocktail 120 | 22.78±0.474      | 157 | 14       | (+) 17.30   | 0.0001            |

**Table S10.** Lifespan analyses – genetic mutants

| <b>Genotype</b>       | <b>Conditions</b> | <b>MS<br/>(days±SEM)</b> | <b>N</b> | <b>Censored</b> | <b>%<br/>Change</b> | <b><i>p</i><br/>Value</b> |
|-----------------------|-------------------|--------------------------|----------|-----------------|---------------------|---------------------------|
| <i>daf-2(e1370)</i>   | Control           | 31.777±0.845             | 123      | 10              |                     |                           |
|                       | Cocktail 55       | 44.587±0.801             | 134      | 14              | (+) 40.31           | 0.0001                    |
|                       | Cocktail 112      | 31.652±0.996             | 113      | 11              | (-) 0.39            | 0.6154                    |
| <i>age-1(hx546)</i>   | Control           | 24.280±0.648             | 140      | 14              |                     |                           |
|                       | Cocktail 55       | 33.899±0.725             | 125      | 7               | (+) 39.62           | 0.0001                    |
|                       | Cocktail 112      | 26.792±0.746             | 134      | 8               | (+) 6.23            | 0.0726                    |
| <i>daf-16(mu86)</i>   | Control           | 13.751±0.355             | 97       | 5               |                     |                           |
|                       | Cocktail 55       | 19.461±0.565             | 100      | 12              | (+) 41.52           | 0.0001                    |
|                       | Cocktail 112      | 14.409±0.374             | 106      | 9               | (+) 4.79            | 0.0359                    |
| <i>skn-1(zu67)</i>    | Control           | 13.111±0.273             | 109      | 13              |                     |                           |
|                       | Cocktail 55       | 13.161±0.322             | 102      | 8               | (+) 0.38            | 0.4681                    |
|                       | Cocktail 112      | 13.489±0.318             | 114      | 11              | (+) 2.88            | 0.1029                    |
| <i>hsf-1(sy441)</i>   | Control           | 12.945±0.335             | 99       | 2               |                     |                           |
|                       | Cocktail 55       | 17.532±0.450             | 100      | 5               | (+) 37.75           | 0.0001                    |
|                       | Cocktail 112      | 17.387±0.484             | 97       | 2               | (+) 42.04           | 0.0001                    |
| <i>jnk-1(gk7)</i>     | Control           | 14.899±0.291             | 130      | 10              |                     |                           |
|                       | Cocktail 55       | 21.309±0.346             | 132      | 15              | (+) 43.02           | 0.0001                    |
|                       | Cocktail 112      | 22.288±0.424             | 120      | 8               | (+) 49.59           | 0.0001                    |
| <i>mpk-1(ku1)</i>     | Control           | 15.084±0.341             | 112      | 5               |                     |                           |
|                       | Cocktail 55       | 20.214±0.508             | 122      | 10              | (+) 37.32           | 0.0001                    |
|                       | Cocktail 112      | 20.295±0.535             | 115      | 4               | (+) 41.18           | 0.0001                    |
| <i>pmk-1(km25)</i>    | Control           | 15.922±0.315             | 130      | 7               |                     |                           |
|                       | Cocktail 55       | 16.072±0.373             | 122      | 10              | (+) 0.94            | 0.1288                    |
|                       | Cocktail 112      | 18.230±0.357             | 140      | 7               | (+) 14.50           | 0.0001                    |
| <i>tir-1(ok1052)</i>  | Control           | 17.593±0.406             | 117      | 6               |                     |                           |
|                       | Cocktail 55       | 17.475±0.434             | 126      | 5               | (-) 0.67            | 0.5654                    |
|                       | Cocktail 112      | 20.585±0.399             | 126      | 10              | (+) 17.01           | 0.0001                    |
| <i>nsy-1(ag3)</i>     | Control           | 15.398±0.325             | 132      | 8               |                     |                           |
|                       | Cocktail 55       | 15.337±0.323             | 125      | 7               | (-) 0.40            | 0.7614                    |
|                       | Cocktail 112      | 18.478±0.283             | 113      | 10              | (+) 20.00           | 0.0001                    |
| <i>sek-1(km4)</i>     | Control           | 15.890±0.263             | 116      | 6               |                     |                           |
|                       | Cocktail 55       | 16.109±0.318             | 130      | 11              | (+) 1.38            | 0.0525                    |
|                       | Cocktail 112      | 19.277±0.349             | 110      | 4               | (+) 21.32           | 0.0001                    |
| <i>sir-2.1(ok434)</i> | Control           | 16.056±0.345             | 120      | 12              |                     |                           |
|                       | Cocktail 55       | 20.972±0.581             | 112      | 8               | (+) 30.62           | 0.0001                    |
|                       | Cocktail 112      | 23.107±0.552             | 125      | 12              | (+) 43.92           | 0.0001                    |
| <i>aak-2(ok524)</i>   | Control           | 16.234±0.349             | 118      | 6               |                     |                           |
|                       | Cocktail 55       | 21.063±0.445             | 110      | 7               | (+) 29.75           | 0.0001                    |
|                       | Cocktail 112      | 21.229±0.452             | 106      | 6               | (+) 30.77           | 0.0001                    |
| <i>eat-2(ad1116)</i>  | Control           | 21.324±0.501             | 130      | 12              |                     |                           |
|                       | Cocktail 55       | 29.361±0.540             | 134      | 10              | (+) 37.69           | 0.0001                    |
|                       | Cocktail 112      | 28.180±0.517             | 122      | 10              | (+) 32.15           | 0.0001                    |
| <i>bar-1(ga80)</i>    | Control           | 12.779±0.384             | 108      | 8               |                     |                           |
|                       | Cocktail 55       | 18.110±0.430             | 112      | 8               | (+) 41.72           | 0.0001                    |
|                       | Cocktail 112      | 15.851±0.350             | 126      | 5               | (+) 24.04           | 0.0001                    |
| <i>dbl-1(nk3)</i>     | Control           | 12.093±0.338             | 100      | 5               |                     |                           |



| <b>Genotype</b> | <b>Conditions</b> | <b>MS<br/>(days±SEM)</b> | <b>N</b> | <b>Censored</b> | <b>%<br/>Change</b> | <b><i>p</i><br/>Value</b> |
|-----------------|-------------------|--------------------------|----------|-----------------|---------------------|---------------------------|
|                 | Cocktail 55       | 16.583±0.329             | 105      | 5               | (+) 37.13           | 0.0001                    |
|                 | Cocktail 112      | 13.894±0.371             | 100      | 7               | (+) 14.89           | 0.0001                    |

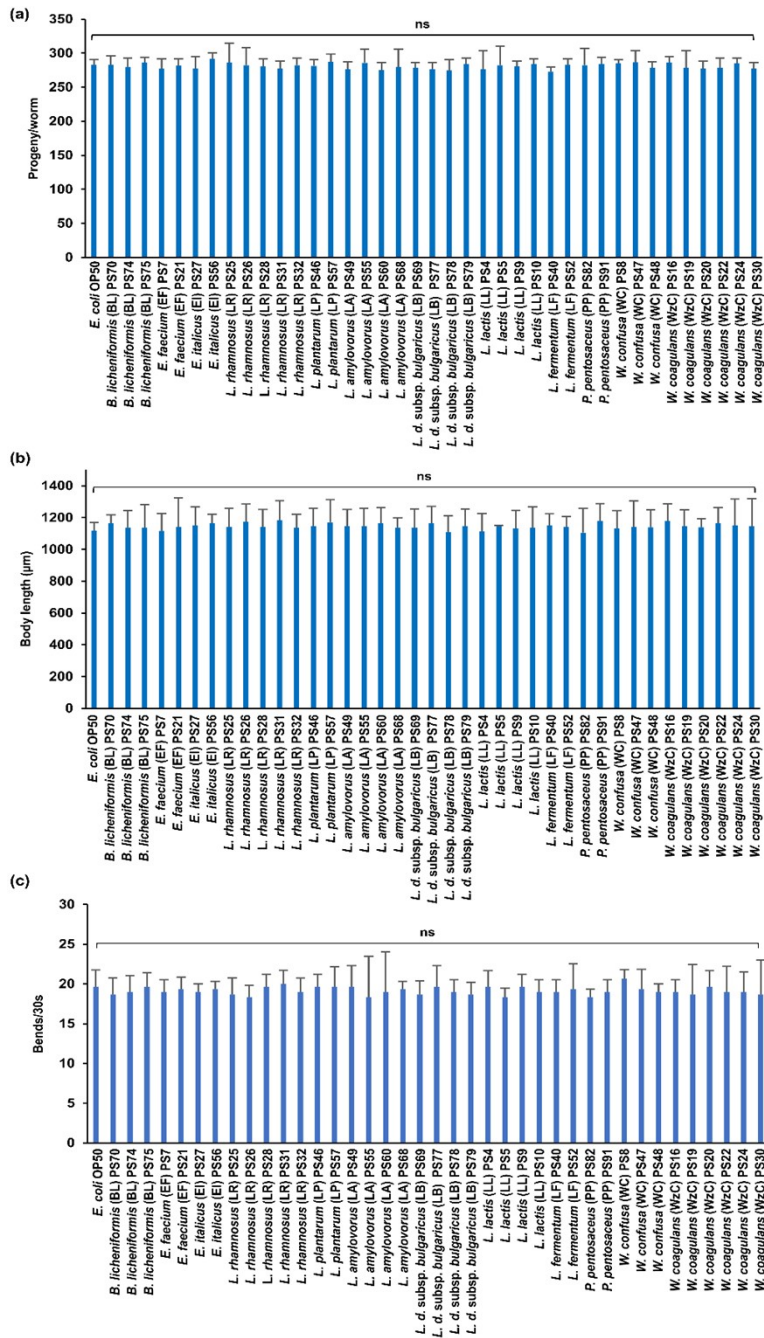

**Fig S1.** Effect of probiotic supplementation on the (a) reproduction, (b) development, and (c) body bends of *C. elegans*. Bars represent the mean  $\pm$  SEM of three independent biological trials, each conducted with four replicates under similar conditions as described. ns – not significant vs. *E. coli* OP50.

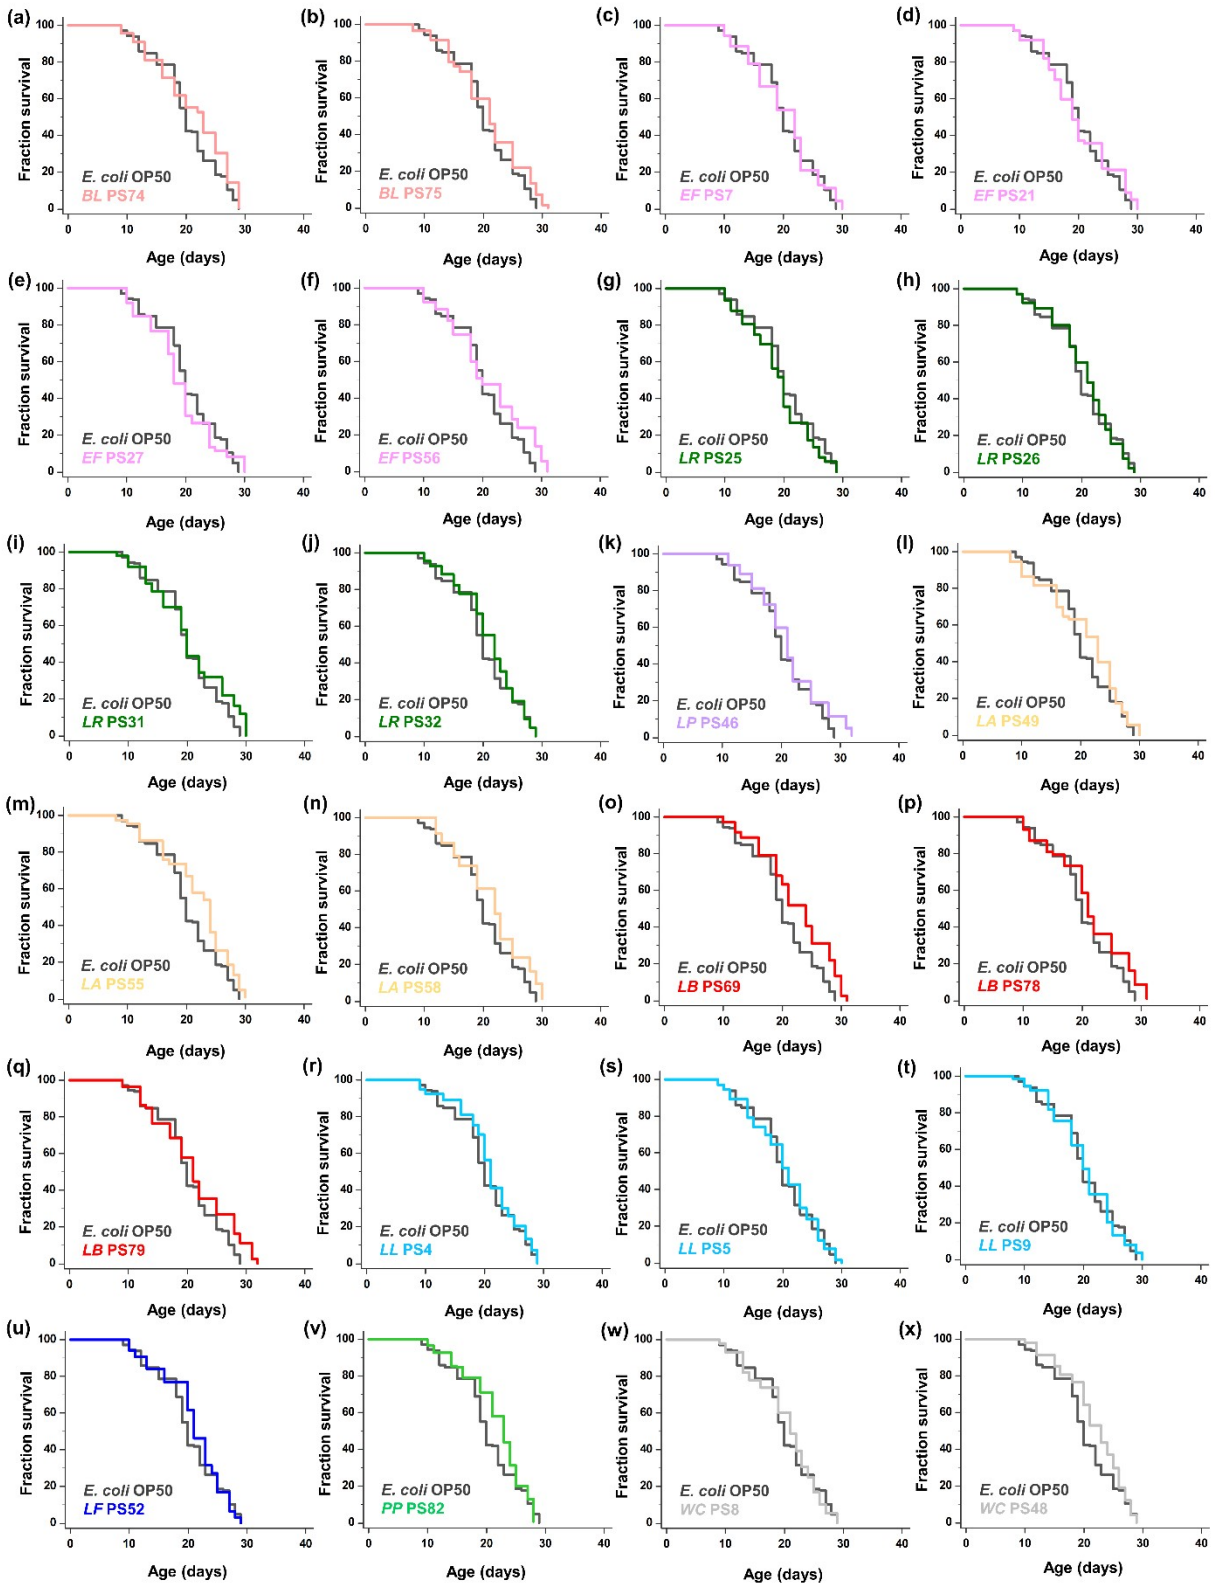

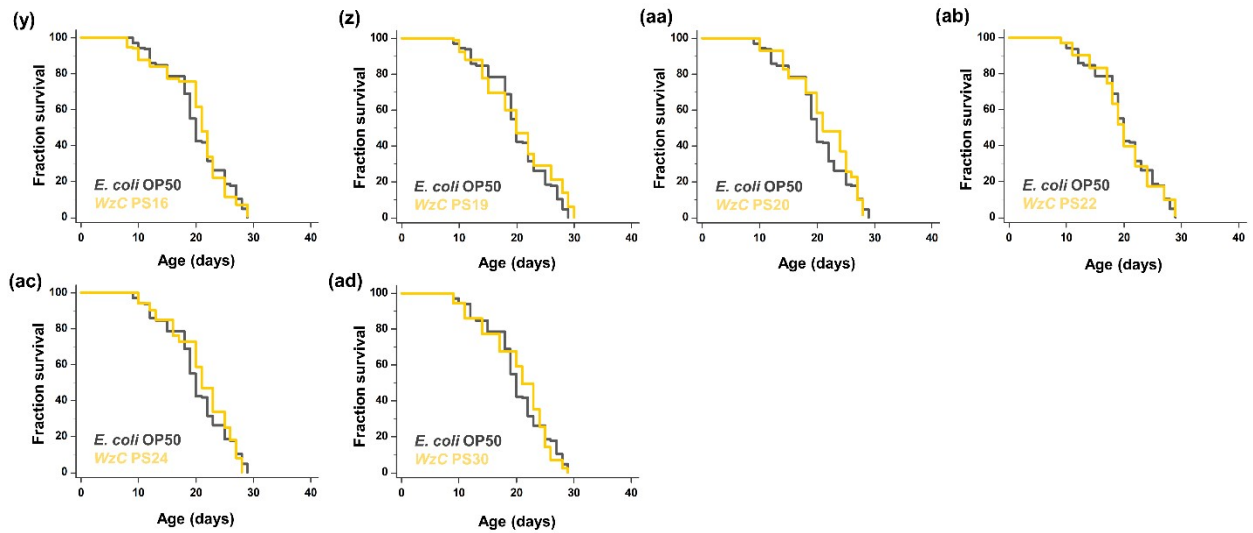

**Fig S2.** Lifespan analyses. (a-ad) Survivorship curves of wild-type *C. elegans* fed with single strain LAB isolated from traditionally fermented barnyard millet. Combined data from three independent biological trials, performed under similar conditions were presented. Data were analyzed by the Mantel-Cox log-rank test. See Supplementary **Table S8** for statistical details of lifespan analyses.

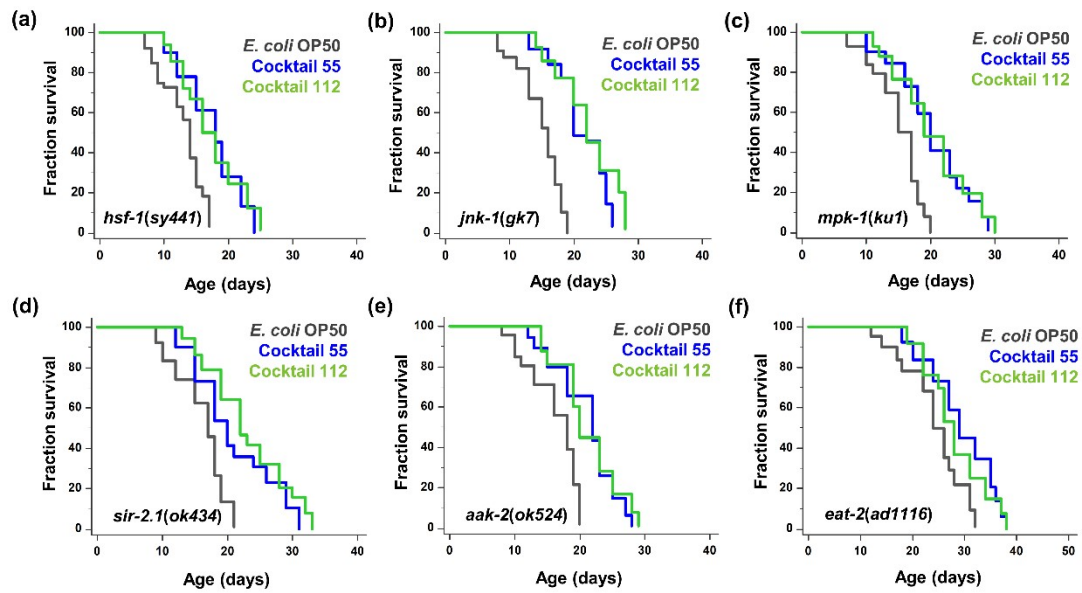

**Fig S3.** Lifespan analyses. Survivorship curves of (a) *hsf-1*, (b) *jnk-1*, (c) *mpk-1*, (d) *sir-2.1*, (e) *aak-2*, and (f) *eat-2* mutant *C. elegans* fed with gerobiotic cocktails. Combined data from three independent biological trials, performed under similar conditions, were presented. Data were analyzed by the Mantel-Cox log-rank test. See Supplementary **Table S11** for statistical details of lifespan analyses.

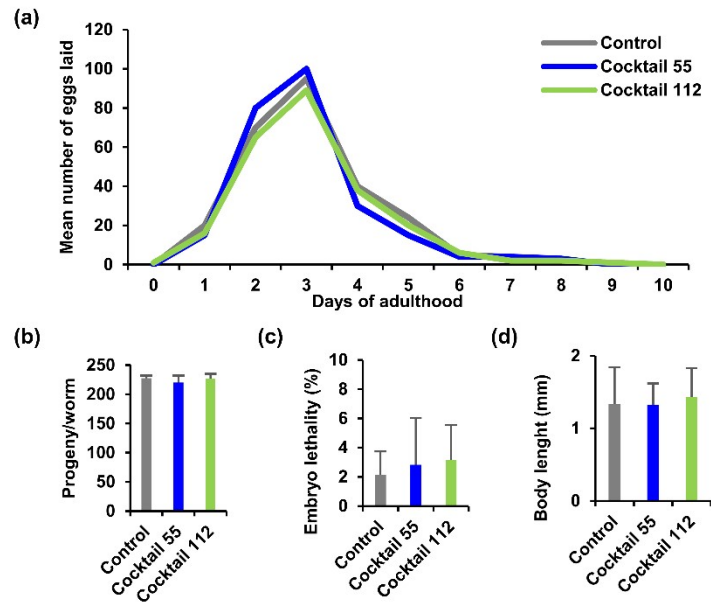

**Fig S4.** Effect of gerobiotic cocktails on the (a) mean egg production, (b) brood size, (c) embryonic lethality, and (d) development of wild-type *C. elegans*. Gerobiotic cocktail feeding did not adversely affect any of the physiological functions.

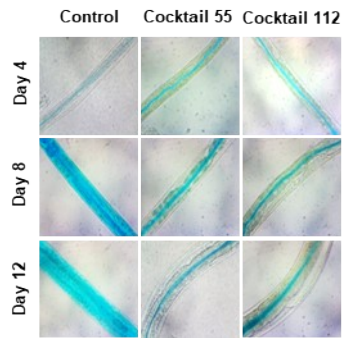

**Fig S5.** DIC images of wild-type worms after being stained with blue food dye under  $40\times$  magnification. This figure is associated with the main text, Fig. 5a.
